# Supplementary material for: Molecular evolution of NASP and conserved histone H3/H4 transport pathway
Source: PubMed Central journal article supplement (PMC4082323; doi:10.1186/1471-2148-14-139), 2014-06-20

# Supplementary Figure S1

A

|                                        |   |   |   |   |   |   |   |   |   |   |   |   |   |   |   |   |   |   |   |   |   |   |   |   |   |   |   |   |   |   |   |   |   |   |
|----------------------------------------|---|---|---|---|---|---|---|---|---|---|---|---|---|---|---|---|---|---|---|---|---|---|---|---|---|---|---|---|---|---|---|---|---|---|
| <i>Homo sapiens</i>                    | A | K | K | L | L | G | L | G | Q | K | H | L | V | M | G | D | I | P | A | A | V | N | A | F | Q | E | A | A | S | L | L | G | K | K |
| <i>Bos taurus</i>                      | A | K | K | L | L | G | L | G | Q | K | H | L | V | M | G | D | I | P | A | A | V | N | A | F | Q | E | A | A | S | L | L | G | K | K |
| <i>Mus musculus</i>                    | A | K | K | L | L | G | L | G | Q | K | H | L | V | M | G | D | I | P | A | A | V | N | A | F | Q | E | A | A | S | L | L | G | K | K |
| <i>Gallus gallus</i>                   | S | K | K | L | L | G | L | G | Q | K | H | L | V | M | G | N | I | P | A | A | V | N | A | F | Q | E | A | A | S | L | L | G | K | K |
| <i>Xenopus laevis</i>                  | A | K | R | L | M | G | A | G | Q | K | H | L | V | M | K | D | V | R | S | A | V | N | L | F | Q | E | A | S | S | L | L | A | K | Q |
| <i>Xenopus tropicalis</i>              | A | K | K | L | M | A | T | G | Q | K | H | L | V | M | K | D | V | R | S | A | V | T | S | F | Q | E | A | S | S | L | L | A | K | K |
| <i>Salmo salar</i>                     | A | N | K | L | I | G | T | G | K | R | H | L | V | M | G | D | V | V | S | A | V | N | Y | L | Q | E | A | C | G | M | L | A | K | R |
| <i>Danio rerio</i>                     | A | K | K | L | I | G | T | G | S | R | H | L | V | M | G | D | V | V | S | A | V | S | V | F | Q | E | A | C | A | M | L | A | E | K |
| <i>Oreochromis niloticus</i>           | A | N | K | L | I | G | T | G | K | K | H | L | V | M | G | K | V | V | E | A | V | S | T | L | Q | E | A | C | G | M | L | A | K | K |
| <i>Takifugu rubripes</i>               | A | K | K | L | V | G | A | G | N | K | Y | L | V | L | G | D | V | V | S | A | V | A | V | F | Q | D | A | C | S | M | L | A | A | K |
| <i>Halocynthia roretzi</i>             | I | Q | E | C | M | G | A | G | K | K | D | L | C | N | D | Y | S | E | A | V | N | C | F | Q | E | A | C | T | L | L | S | G | K |   |
| <i>Ciona intestinalis</i>              | Y | A | I | N | L | A | N | G | K | K | N | L | C | G | D | F | P | E | A | V | A | C | F | Q | A | T | S | A | L | Q | S | E | R |   |
| <i>Tribolium castaneum</i>             | P | K | E | L | F | G | O | G | V | R | A | Y | V | L | Q | D | F | D | T | A | V | K | A | F | S | K | A | S | E | L | L | A | A | E |
| <i>Danaus plexippus</i>                | P | E | E | L | L | A | A | G | R | R | H | L | A | V | R | D | Y | T | S | A | A | E | T | L | A | T | A | C | E | L | L | A | K | T |
| <i>Bombus terrestris</i>               | A | A | T | A | I | S | H | G | K | R | H | L | L | V | R | D | Y | T | M | A | V | T | A | L | A | O | A | C | Q | L | L | A | E | K |
| <i>Megachile rotundata</i>             | P | A | T | A | I | S | H | G | K | R | H | L | L | V | R | D | Y | T | M | A | V | T | A | L | A | O | A | C | Q | M | L | V | E | K |
| <i>Apis florea</i>                     | P | A | T | A | I | S | H | G | K | R | H | L | L | V | R | D | Y | T | M | A | V | T | A | L | A | O | A | C | Q | L | L | A | E | K |
| <i>Drosophila melanogaster</i>         | G | K | E | L | F | S | Q | G | S | R | N | F | L | V | K | S | Y | D | E | A | A | D | E | L | S | O | V | C | Q | L | Y | E | E | V |
| <i>Drosophila sechellia</i>            | G | K | E | L | F | S | Q | G | S | R | N | F | L | V | K | S | Y | D | E | A | A | D | E | L | S | O | V | C | Q | L | Y | E | E | V |
| <i>Drosophila erecta</i>               | G | K | E | L | F | S | Q | G | S | R | N | F | L | V | K | S | Y | D | E | A | A | D | E | L | S | O | V | C | Q | L | Y | E | E | V |
| <i>Schizosaccharomyces pombe</i>       | I | E | Q | L | V | T | Q | G | N | M | A | Y | A | Q | K | N | Y | E | E | A | V | D | K | Y | G | O | A | L | M | Q | S | E | S | I |
| <i>Trichosporon asahii</i>             | V | A | K | L | V | S | E | G | K | K | A | I | A | L | R | Q | W | E | E | G | V | G | K | Y | A | D | A | L | D | L | Q | R | E | L |
| <i>Caenorhabditis elegans</i>          | L | A | E | L | L | A | A | G | R | R | A | L | K | V | N | D | I | D | K | A | S | D | S | L | S | E | A | T | E | L | S | S | E | I |
| <i>Caenorhabditis remanei</i>          | L | A | E | L | L | A | N | G | R | R | E | L | R | V | N | N | N | A | E | A | S | E | I | L | S | E | A | A | E | L | S | V | E | I |
| <i>Caenorhabditis brenneri</i>         | L | S | E | L | L | T | A | G | R | R | A | I | R | V | N | N | I | E | E | A | S | E | I | L | S | O | A | T | E | L | S | T | E | I |
| <i>Caenorhabditis briggsae</i>         | A | A | E | L | L | A | A | G | R | R | A | L | K | V | S | D | Y | E | T | A | T | E | A | L | S | E | A | S | E | M | I | V | E | L |
| <i>Tetrahymena thermophila</i>         | L | E | S | R | L | T | E | A | V | E | C | Y | K | N | K | N | F | D | Q | A | E | N | I | F | S | D | L | M | I | Y | A | V | K | F |
| <i>Ichthyophthirius multifiliis</i>    | L | E | Q | Q | I | E | K | V | K | E | H | I | R | K | N | E | F | E | S | A | E | E | I | F | S | D | L | M | I | D | A | V | K | Y |
| <i>Paramecium tetraurelia</i>          | A | K | E | L | F | N | E | G | K | H | N | E | A | E | V | M | M | Q | G | V | M | Q | Q | A | L | A | Y | Y | K | D | E | L | A | V |
| <i>Plasmodium yoelii</i>               | A | Q | E | L | F | D | M | G | N | L | E | F | K | E | S | K | N | Y | D | V | A | A | E | R | F | S | M | A | V | E | K | K | V | K |
| <i>Neospora caninum</i>                | A | E | T | L | L | D | E | G | K | A | L | F | R | S | R | N | W | A | K | A | A | E | Y | F | S | R | A | V | E | R | K | V | T | E |
| <i>Toxoplasma gondii</i>               | A | D | T | L | L | G | E | G | K | T | V | F | R | S | R | N | W | A | K | A | A | E | Y | F | S | R | A | V | E | R | K | V | A | E |
| <i>Saccharomyces cerevisiae</i>        | M | E | R | Q | V | Q | I | A | K | D | L | L | A | Q | K | K | F | L | E | A | A | K | R | C | Q | O | T | L | D | S | L | P | K | D |
| <i>Schizosaccharomyces japonicus</i>   | I | D | Q | L | V | V | Q | G | N | K | A | F | S | Q | K | H | Y | E | I | A | A | E | K | Y | S | D | A | L | E | V | L | E | Q | K |
| <i>Tetrapisispora phaffii</i>          | I | K | T | L | V | V | E | G | A | K | Y | T | A | N | S | D | L | A | N | A | S | K | C | Y | A | E | L | D | L | E | S | K | T |   |
| <i>Candida albicans</i>                | V | A | K | L | I | S | E | G | S | R | A | Y | S | S | K | D | F | D | L | A | S | E | K | Y | G | E | A | C | E | E | Y | S | K | S |
| <i>Coccidioides immitis</i>            | A | E | L | K | R | L | A | S | A | K | E | A | I | K | D | Y | N | S | A | A | D | L | Y | S | R | A | V | E | I | Q | A | E | L | N |
| <i>Neurospora crassa</i>               | L | A | D | L | S | A | H | A | A | Q | Y | A | Q | K | N | Y | D | E | A | A | E | L | Y | A | Q | A | A | E | M | Q | A | E | M |   |
| <i>Cryptococcus gattii</i>             | V | E | K | L | V | A | E | G | K | K | A | I | A | L | H | E | W | E | Q | G | V | D | R | Y | A | T | A | L | D | R | M | R | L | L |
| <i>Arabidopsis thaliana</i>            | A | E | E | L | T | E | K | G | S | V | F | L | K | E | N | D | F | A | E | A | V | D | C | F | S | R | A | L | E | I | R | V | A | H |
| <i>Capsella rubella</i>                | A | D | E | L | T | E | K | G | S | V | F | L | K | E | Q | D | F | G | E | A | V | D | C | F | S | R | A | L | E | I | R | V | E | H |
| <i>Theobroma cacao</i>                 | A | D | E | L | A | E | K | G | S | K | A | F | K | E | N | D | F | A | E | A | A | D | C | F | S | R | A | L | E | I | R | V | A | H |
| <i>Cicer arietinum</i>                 | A | D | E | L | M | D | K | E | N | K | A | M | K | D | N | D | Y | G | E | A | A | D | N | Y | S | R | A | L | E | I | R | V | G | H |
| <i>Albugo laibachii</i>                | Q | D | P | R | F | Q | R | G | L | C | L | L | K | E | H | D | Y | E | A | A | V | T | I | F | E | D | L | L | K | T | K | V | E | L |
| <i>Orcinus orca</i>                    | A | K | K | L | L | G | L | G | Q | K | H | L | V | M | G | D | I | P | A | A | V | N | A | F | Q | E | A | A | S | L | L | G | K | K |
| <i>Thalassiosira pseudonana</i>        | S | L | P | S | H | A | L | A | K | Q | Y | L | N | T | G | Q | F | N | Q | A | L | E | V | L | E | E | S | L | G | E | M | H | E | R |
| <i>Maylandia zebra</i>                 | A | K | K | L | I | G | T | G | K | R | H | L | V | M | G | D | V | V | S | A | V | N | V | F | Q | E | A | C | S | M | L | A | E | K |
| <i>Taeniopygia guttata</i>             | S | K | K | L | L | G | L | G | Q | K | H | L | V | M | G | N | I | P | A | A | V | N | A | F | Q | E | A | A | S | L | L | G | K | K |
| <i>Choanoflagellida Salpingoecidae</i> | A | E | V | F | A | A | A | K | S | L | Y | H | K | D | E | V | D | Q | A | G | A | I | L | S | D | L | L | E | T | M | V | E | Q | F |
| <i>Dictyostelium fasciculatum</i>      | M | G | K | V | K | A | A | K | A | L | D | D | Q | D | Y | L | S | A | C | E | L | L | G | S | S | L | S | A | L | S | P | I | Y |   |
| <i>Trypanosoma cruzi</i>               | A | N | E | A | R | A | V | G | I | A | H | Y | N | N | H | R | Y | E | D | A | L | D | I | Q | Y | R | V | R | H | F | E | K | K |   |
| <i>Trypanosoma brucei</i>              | A | V | A | M | R | A | V | G | L | E | L | F | N | K | H | N | Y | E | E | A | L | D | V | Q | Y | R | I | V | R | Y | F | E | N | K |

**B**

|                                        |                                                                       |
|----------------------------------------|-----------------------------------------------------------------------|
| <i>Homo sapiens</i>                    | GEAFF F YGK S L L E L A R --- L E L A W D M L D L A K I I F K R Q     |
| <i>Bos taurus</i>                      | GEAFF F YGK S L L E L A R --- L E L A W D M L D L A K I I F K R Q     |
| <i>Mus musculus</i>                    | GEAFF F YGK S L L E L A R --- L E L A W D M L D L A K I I F K R Q     |
| <i>Orcinus orca</i>                    | GEAFF F YGK S L L E L A R --- L E L A W D M L D L A K I I F K R Q     |
| <i>Gallus gallus</i>                   | AEAFF Y YGK S L L E L A R --- L E L P W D M L E L A K V I Y K R Q     |
| <i>Taeniopygia guttata</i>             | AEAFF Y YGK S L L E L A R --- L E L A W D M L E L A K V I Y K R Q     |
| <i>Xenopus laevis</i>                  | AEAFY S YGM S L L E L A R --- L Q L A W E M L D L C K I I F K R Q     |
| <i>Xenopus tropicalis</i>              | ADAFY S YGM S L L E L A R --- L Q L A W E M L D L C K L I F K R Q     |
| <i>Salmo salar</i>                     | GEAFF L CGK A L L E L A R --- L Q L A W E M L E V A K V I Y K R K     |
| <i>Danio rerio</i>                     | GEAFF F CGK A L L E L A R --- L R L A W E M L E V A K V I Y K R K     |
| <i>Maylandia zebra</i>                 | GEAFF L CGK S L L E L A R --- L Q L A W E M L E V A K V I Y K R K     |
| <i>Oreochromis niloticus</i>           | GEAFF WYGK A L L D L A R --- L Q L A W E M L E V A K V I Y K R K      |
| <i>Takifugu rubripes</i>               | GEALF L CGK S L L E L A R --- L Q L A W E M L E V A K V I Y K R K     |
| <i>Halocynthia roretzi</i>             | CEAYY Y YGV S L L E L A R --- M Q L A W E M L E L A K V L Y K K H     |
| <i>Ciona intestinalis</i>              | AESFY F YGK A L L E L A R --- M Q L A W E M L E L A K V L Y Q K K     |
| <i>Tribolium castaneum</i>             | GDVYL Y YGK S L L E L S R --- L Q V A W E V L E L A K R I F T N R     |
| <i>Danaus plexippus</i>                | AEAYL WYGK S L L G L S R --- L Q L A W E M L D L S R N I L Q K R      |
| <i>Bombus terrestris</i>               | GEPYL L YGR A L L G L A R --- L Q V A W E V L E L A K L V L L K R     |
| <i>Megachile rotundata</i>             | GEPYL L YGR A L L G L A R --- L Q V A W E V L E L A K L V L L K R     |
| <i>Apis florea</i>                     | GEPYL L YGR A L L G L A R --- L Q V A W E V L E L A K L V L L K R     |
| <i>Drosophila melanogaster</i>         | GQPLL L YAK A L I A M A L --- L Q L A W E I L E A A A Q I F S R Q     |
| <i>Drosophila sechellia</i>            | GQPLL L YAK A L I A M A L --- L Q L A W E I L E A A A Q I F S R Q     |
| <i>Drosophila erecta</i>               | GQPLL L YAK A L I A M A L --- L Q L A W E I L E A A A Q I F S R Q     |
| <i>Caenorhabditis elegans</i>          | FDSL Y YGMA T L E L A K --- M K L S W E I L E T A R C I A A A K       |
| <i>Caenorhabditis remanei</i>          | FDACY Y YGMA S L E V A K --- M K L A W E L L E T A R C I A A A K      |
| <i>Caenorhabditis brenneri</i>         | FDAYY F YGMA T L E L A K --- M R L A W E L L E T C R C I A I V K      |
| <i>Caenorhabditis briggsae</i>         | Y E Y Y Y Y YGMA T L E L G K --- M K L A W E V L E N A R C I A M A K  |
| <i>Tetrahymena thermophila</i>         | SKYFF F YGD M L L S K L E --- L Q L A W E N L E L S R K I Y N Q E     |
| <i>Ichthyophthirius multifiliis</i>    | SKYYY Y YGD M L L T K Q D --- L Q L A W E N L E L C K K I I Y K N     |
| <i>Paramecium tetraurelia</i>          | AEYYY MYGT I I V L K L S --- F H I A W E N L E V A R V I L E K E      |
| <i>Plasmodium yoelii</i>               | REYYL C FAD A L L T K E E --- E Q L A F E M F E F S R K C Y E M L     |
| <i>Neospora caninum</i>                | STYYL WFGD A L L T K E E --- E L A F E M L E M A K R C L L K K        |
| <i>Toxoplasma gondii</i>               | STFYL WFGD A L L T K E E --- E L A F E M L E M A K Q C L L K K        |
| <i>Albugo laibachii</i>                | APIYY E YGN A L L S L V E --- L E L A W E M L E V A R V I Y T R H     |
| <i>Thalassiosira pseudonana</i>        | APLYY L YGT T L L Y L V E --- L Q I A W E N L E T A R S I M S K M     |
| <i>Schizosaccharomyces pombe</i>       | RNVLWL YGK S L F Q I A I --- D F N V A W E V L D L T R V M Q S K      |
| <i>Trichosporon asahii</i>             | APLLL S YGK A L Y E L A L --- D F N A A W E V L D V A R T I Y T R     |
| <i>Saccharomyces cerevisiae</i>        | PELFT I FAQ A V Y N M E V --- Y E N A L D L L A Q A L M L L G R P     |
| <i>Schizosaccharomyces japonicus</i>   | RNVLWL YGR T L F E I A L --- F G L A W E V L D L C R V L Q T R A      |
| <i>Tetrapisispora phaffii</i>          | PDHVML LAS C L Y Q L G V --- F Q N T L E L L Q V A R I I Y M E N      |
| <i>Cryptococcus gattii</i>             | APLLL A YGK A L Y D L A S --- Y N A A W E V L D V A R T I Y Q K I     |
| <i>Candida albicans</i>                | ADLLE L YGK A V F Q S G V --- F E V A W E L L D L A R A L F E E K     |
| <i>Coccidioides immitis</i>            | ADLLY S YGR C L Y H V A V --- F E N A F E T L D M A R V L L S R Q     |
| <i>Neurospora crassa</i>               | AEILF L YGR A L F K V G Q --- L A V A F Q V L D L A V L F E K K L     |
| <i>Arabidopsis thaliana</i>            | I N A Y Y R YGL A L L A K A Q --- L D M A W K M L D I A R A I T D K Q |
| <i>Capsella rubella</i>                | V N A Y Y R YGS A L L E K A Q --- L D M A W K M L D I A R A I T D K Q |
| <i>Theobroma cacao</i>                 | L K A Y Y L YGR A L L Y K A Q --- L D L A W K M L D V A R A I A D K Q |
| <i>Cicer arietinum</i>                 | V H T Y Y K YGC A L L Y K A Q --- L D L A W K M L D I A R A I V E K Q |
| <i>Choanoflagellida Salpingoecidae</i> | ARVYQL YGL C L I A S A R --- V Q V G W E C L E C A R V I Y S R L      |
| <i>Dictyostelium fasciculatum</i>      | APIYL K YGR A L L F S Y K --- L E V A W D V L E L A R V I Y E K N     |
| <i>Trypanosoma cruzi</i>               | GVYFL D YGL S Q L R V L Q --- L E A C F I N L D V A R V C F Q K Q     |
| <i>Trypanosoma brucei</i>              | GIYFL D YGL S Q L R M I Q --- L E A C F T N L D V A R V C F Q K Q     |

C

|                                        |       |    |     |    |    |       |      |     |     |     |     |      |      |   |      |   |   |   |   |   |   |   |   |   |   |   |   |   |   |   |   |   |   |   |
|----------------------------------------|-------|----|-----|----|----|-------|------|-----|-----|-----|-----|------|------|---|------|---|---|---|---|---|---|---|---|---|---|---|---|---|---|---|---|---|---|---|
| <i>Homo sapiens</i>                    | AQAHL | KL | GEV | SV | E  | SENYV | QAVE | EF  | QS  | CLN | L   | QEQY |      |   |      |   |   |   |   |   |   |   |   |   |   |   |   |   |   |   |   |   |   |   |
| <i>Bos taurus</i>                      | AQAHL | KL | GEV | SV | E  | SENYL | QAVE | EF  | QA  | CLN | L   | QEQY |      |   |      |   |   |   |   |   |   |   |   |   |   |   |   |   |   |   |   |   |   |   |
| <i>Mus musculus</i>                    | AQAHL | KL | GEV | SV | E  | SENYI | QAVE | EF  | QA  | CLS | L   | QEQY |      |   |      |   |   |   |   |   |   |   |   |   |   |   |   |   |   |   |   |   |   |   |
| <i>Orcinus orca</i>                    | AQAHL | KL | GEV | SV | E  | SENYI | QAVE | EF  | QA  | CLN | L   | QEQY |      |   |      |   |   |   |   |   |   |   |   |   |   |   |   |   |   |   |   |   |   |   |
| <i>Gallus gallus</i>                   | AQAHL | KL | GEV | SI | E  | SENYV | QAI  | EEF | QA  | CLA | L   | QQKY |      |   |      |   |   |   |   |   |   |   |   |   |   |   |   |   |   |   |   |   |   |   |
| <i>Taeniopygia guttata</i>             | AQAHL | KL | GEV | SI | E  | SENYT | QAI  | EEF | QA  | CLA | L   | QQKY |      |   |      |   |   |   |   |   |   |   |   |   |   |   |   |   |   |   |   |   |   |   |
| <i>Xenopus laevis</i>                  | AQAHL | KL | GEV | CI | E  | SENY  | S    | QAV | EDF | LA  | CLN | I    | QKEH |   |      |   |   |   |   |   |   |   |   |   |   |   |   |   |   |   |   |   |   |   |
| <i>Xenopus tropicalis</i>              | AQAHL | KL | GEV | SV | E  | SENY  | S    | QAV | EDF | LA  | CLN | I    | QKEH |   |      |   |   |   |   |   |   |   |   |   |   |   |   |   |   |   |   |   |   |   |
| <i>Salmo salar</i>                     | AQAHL | NL | GEV | AA | E  | SGNYS | QAV  | DDF | QQ  | CLS | L   | QLKH |      |   |      |   |   |   |   |   |   |   |   |   |   |   |   |   |   |   |   |   |   |   |
| <i>Danio rerio</i>                     | AQIHL | KL | AEV | GV | E  | SGNYS | QAL  | EDS | NE  | CLT | L   | QLKH |      |   |      |   |   |   |   |   |   |   |   |   |   |   |   |   |   |   |   |   |   |   |
| <i>Maylandia zebra</i>                 | AQAYL | KL | GEV | SA | E  | SGNY  | P    | QAL | DDF | QE  | CLA | L    | QLKY |   |      |   |   |   |   |   |   |   |   |   |   |   |   |   |   |   |   |   |   |   |
| <i>Oreochromis niloticus</i>           | AQAHL | KL | GEV | SA | E  | SGNY  | P    | QAL | EDF | QE  | CLK | L    | QVKH |   |      |   |   |   |   |   |   |   |   |   |   |   |   |   |   |   |   |   |   |   |
| <i>Takifugu rubripes</i>               | AQIYL | KL | GEV | SA | E  | SGNY  | P    | QAL | EDF | QE  | CLC | L    | QLKH |   |      |   |   |   |   |   |   |   |   |   |   |   |   |   |   |   |   |   |   |   |
| <i>Halocynthia roretzi</i>             | AQCHL | KL | GE  | L  | GL | E     | VEN  | HP  | QAI | G   | DF  | LE   | CLV  | I | QKDL |   |   |   |   |   |   |   |   |   |   |   |   |   |   |   |   |   |   |   |
| <i>Ciona intestinalis</i>              | AQCHS | KL | GE  | L  | GL | E     | VEN  | YS  | QSI | G   | DF  | LE   | SLV  | I | HKE  |   |   |   |   |   |   |   |   |   |   |   |   |   |   |   |   |   |   |   |
| <i>Tribolium castaneum</i>             | AETLI | VL | GEI | SL | E  | SGN   | F    | T   | S   | AI  | E   | DM   | T    | Q | G    | L | E | I | Q | K | T | L |   |   |   |   |   |   |   |   |   |   |   |   |
| <i>Danaus plexippus</i>                | AEVHL | AL | GEV | AL | E  | SET   | Y    | D   | K   | A   | V   | A    | D    | M | I    | S | C | L | D | I | Q | K | E | L |   |   |   |   |   |   |   |   |   |   |
| <i>Bombus terrestris</i>               | S     | D  | A   | Y  | R  | L     | L    | GEV | A   | M   | E   | G    | G    | N | F    | Q | G | A | L | N | D | L | H | R | C | L | E | L | L | Q | Q | I |   |   |
| <i>Megachile rotundata</i>             | A     | D  | A   | Y  | R  | L     | L    | GEV | A   | M   | E   | G    | G    | N | F    | Q | G | A | L | N | D | L | H | R | C | L | E | L | L | Q | Q | I |   |   |
| <i>Apis florea</i>                     | A     | D  | A   | Y  | R  | L     | L    | GEV | A   | M   | E   | G    | G    | N | F    | Q | G | A | L | N | D | L | H | R | C | L | D | L | L | Q | Q | I |   |   |
| <i>Drosophila melanogaster</i>         | A     | E  | V   | Q  | T  | E     | L    | A   | N   | I   | E   | F    | E    | N | G    | I | L | E | A | A | R | E | D | Y | E | K | A | L | K | I | H | G | E | L |
| <i>Drosophila sechellia</i>            | A     | E  | V   | Q  | T  | E     | L    | A   | N   | I   | E   | F    | E    | N | G    | I | L | E | A | A | R | E | D | Y | E | K | A | L | K | I | H | G | E | L |
| <i>Drosophila erecta</i>               | A     | E  | V   | Q  | T  | E     | L    | A   | N   | I   | E   | F    | E    | N | G    | I | L | E | A | A | R | E | D | Y | E | K | A | L | K | I | H | G | E | L |
| <i>Caenorhabditis elegans</i>          | A     | D  | V   | L  | V  | L     | L    | GEH | G   | I   | S   | D    | G    | K | Y    | T | Q | A | F | E | D | L | D | R | A | L | N | I | Q | R | N | V |   |   |
| <i>Caenorhabditis remanei</i>          | A     | D  | V   | L  | I  | L     | L    | GDH | G   | I   | A   | D    | E    | N | Y    | E | Q | A | R | E | D | L | G | R | A | L | G | I | Q | Q | N | I |   |   |
| <i>Caenorhabditis brenneri</i>         | A     | D  | V   | L  | V  | L     | L    | GEH | G   | V   | S   | D    | G    | K | Y    | D | Q | A | K | E | D | L | E | K | A | L | E | I | Q | K | N | V |   |   |
| <i>Caenorhabditis briggsae</i>         | A     | D  | V   | L  | V  | V     | L    | GDH | S   | V   | S   | D    | G    | K | Y    | D | Q | A | L | E | D | L | E | Q | A | L | E | I | Q | K | N | V |   |   |
| <i>Tetrahymena thermophila</i>         | V     | E  | V   | T  | L  | R     | I    | A   | D   | L   | E   | Q    | W    | R | D    | N | F | S | D | A | L | K | E | T | M | A | L | Q | L | S | K | E | I |   |
| <i>Ichthyophthirius multifiliis</i>    | V     | Q  | V   | T  | L  | R     | L    | G   | D   | L   | E   | A    | W    | R | D    | S | L | K | D | S | V | E | Q | Y | T | E | A | L | N | I | A | F | Q | I |
| <i>Paramecium tetraurelia</i>          | A     | K  | V   | Y  | I  | K     | L    | A   | E   | L   | D   | Q    | W    | R | D    | K | F | D | D | A | Q | E | N | L | Q | K | S | L | Q | L | R | L | Q | C |
| <i>Plasmodium yoelii</i>               | S     | Y  | V   | F  | I  | R     | L    | G   | D   | I   | S   | L    | L    | N | H    | F | F | E | A | L | K | E | Y | E | K | C | V | N | L | R | E | E | H |   |
| <i>Neospora caninum</i>                | S     | F  | A   | Y  | V  | R     | L    | A   | D   | M   | Q   | L    | M    | N | E    | R | Y | D | E | A | A | Q | D | Y | R | E | A | V | S | L | R | E | R | Y |
| <i>Toxoplasma gondii</i>               | S     | F  | A   | F  | V  | R     | L    | A   | D   | M   | Q   | L    | M    | N | E    | R | Y | D | E | A | A | Q | D | Y | G | E | A | V | S | L | R | E | R | Y |
| <i>Albugo laibachii</i>                | A     | R  | V   | Y  | M  | R     | L    | G   | D   | L   | S   | M    | E    | S | E    | N | F | T | R | A | K | Q | D | Y | E | N | S | L | V | L | N | K | K | I |
| <i>Thalassiosira pseudonana</i>        | A     | K  | V   | H  | S  | R     | L    | G   | D   | L   | Q   | K    | A    | N | G    | N | S | T | G | S | I | S | D | Y | I | I | S | L | S | I | R | A | K | C |
| <i>Schizosaccharomyces pombe</i>       | A     | D  | I   | Y  | D  | L     | L    | GE  | L   | S   | L   | E    | I    | E | N    | F | S | Q | A | S | Q | D | L | K | T | A | L | E | W | K | E | K | V |   |
| <i>Trichosporon asahii</i>             | S     | E  | C   | Y  | L  | A     | L    | G   | D   | V   | S   | C    | E    | T | E    | N | F | D | Q | A | V | K | D | Y | E | A | A | V | K | L | K | A | S | L |
| <i>Saccharomyces cerevisiae</i>        | G     | D  | V   | Y  | I  | L     | M    | G   | D   | I   | E   | R    | E    | A | E    | M | F | S | R | A | I | H | H | Y | L | K | A | L | G | Y | Y | K | T | L |
| <i>Schizosaccharomyces japonicus</i>   | A     | D  | V   | L  | D  | L     | L    | GE  | I   | S   | L   | E    | N    | E | S    | F | E | Q | A | A | Q | D | L | Q | E | A | L | L | W | K | Q | Q | V |   |
| <i>Tetrapisispora phaffii</i>          | G     | D  | V   | D  | Q  | E     | V    | E   | D   | F   | A   | T    | A    | V | E    | D | Y | K | Q | A | I | D | Y | I | K | E | T | D | E | F | E | N | E | N |
| <i>Cryptococcus gattii</i>             | S     | D  | C   | Y  | L  | A     | L    | G   | N   | V   | S   | C    | E    | T | E    | N | F | S | Q | A | V | Q | D | F | T | A | A | V | D | I | Q | N | T | I |
| <i>Candida albicans</i>                | S     | E  | T   | Y  | D  | I     | L    | GEV | S   | L   | E   | A    | E    | N | F    | N | Q | A | A | D | D | L | R | K | C | L | E | L | R | L | E | L |   |   |
| <i>Coccidioides immitis</i>            | S     | D  | I   | Y  | D  | L     | Q    | A   | E   | I   | S   | L    | E    | G | E    | R | F | S | E | A | V | S | D | L | R | A | A | L | K | L | K | R | E | L |
| <i>Neurospora crassa</i>               | G     | D  | L   | H  | D  | L     | L    | AEI | S   | L   | E   | N    | E    | R | Y    | P | A | A | I | T | D | S | R | A | S | L | K | Y | K | O | Q | L |   |   |
| <i>Arabidopsis thaliana</i>            | V     | D  | I   | L  | C  | S     | L    | AEV | S   | L   | E   | R    | E    | D | I    | E | S | S | L | S | D | Y | K | N | A | L | S | I | L | E | R | L |   |   |
| <i>Capsella rubella</i>                | V     | D  | I   | L  | C  | A     | L    | AEI | S   | L   | E   | R    | E    | D | I    | E | S | S | L | S | D | Y | K | K | A | L | S | I | L | E | R | L |   |   |
| <i>Theobroma cacao</i>                 | V     | D  | I   | L  | S  | A     | L    | AEV | A   | L   | E   | R    | E    | D | I    | E | S | S | L | S | D | Y | Q | K | A | L | S | I | L | O | Q | L |   |   |
| <i>Cicer arietinum</i>                 | V     | D  | I   | L  | S  | T     | L    | G   | D   | V   | A   | L    | E    | R | E    | D | F | E | T | S | L | S | D | Y | Q | K | A | L | S | I | L | E | Q | L |
| <i>Choanoflagellida Salpingoecidae</i> | A     | D  | V   | H  | F  | E     | L    | G   | S   | V   | Y   | L    | E    | T | D    | Q | Y | R | E | A | E | E | L | E | Q | C | V | A | L | R | R | K | W |   |
| <i>Dictyostelium fasciculatum</i>      | S     | D  | V   | H  | M  | L     | L    | G   | D   | L   | N   | V    | E    | L | E    | N | H | Q | D | A | L | E | E | Y | N | I | A | L | Q | L | R | K | K | Q |
| <i>Trypanosoma cruzi</i>               | A     | E  | V   | H  | N  | S     | I    | A   | Q   | L   | Q   | V    | E    | R | E    | D | F | D | S | A | L | K | E | Y | E | S | E | L | M | T | Y | R | F | I |
| <i>Trypanosoma brucei</i>              | A     | E  | V   | H  | N  | A     | I    | A   | Q   | V   | Q   | V    | E    | R | E    | A | Y | E | A | L | K | E | Y | E | S | E | L | F | I | Y | R | Y | L |   |

D

|                                        |   |   |   |   |   |   |   |   |   |   |   |   |   |   |   |   |   |   |   |   |   |   |   |   |   |   |   |   |   |   |   |   |   |   |
|----------------------------------------|---|---|---|---|---|---|---|---|---|---|---|---|---|---|---|---|---|---|---|---|---|---|---|---|---|---|---|---|---|---|---|---|---|---|
| <i>Homo sapiens</i>                    | A | E | T | H | Y | Q | L | G | L | A | Y | G | Y | N | S | Q | Y | D | E | A | V | A | Q | F | S | K | S | I | E | V | I | E | N | R |
| <i>Bos taurus</i>                      | A | E | T | H | Y | Q | L | G | L | A | Y | G | Y | N | S | Q | Y | D | E | A | V | A | Q | F | S | K | S | I | E | V | I | E | K | R |
| <i>Mus musculus</i>                    | A | E | T | H | Y | Q | L | G | L | A | Y | G | Y | N | S | Q | Y | D | E | A | V | A | Q | F | G | K | S | I | D | V | I | E | K | R |
| <i>Orcinus orca</i>                    | A | E | T | H | Y | Q | L | G | L | A | Y | G | Y | N | S | Q | Y | D | E | A | V | A | Q | F | S | K | S | I | E | V | I | E | K | R |
| <i>Gallus gallus</i>                   | A | E | S | H | Y | Q | L | A | L | A | Y | H | Y | N | S | Q | F | D | E | A | V | L | Q | F | G | K | S | V | E | V | I | D | K | R |
| <i>Taeniopygia guttata</i>             | A | E | S | H | Y | Q | L | A | L | A | Y | H | Y | N | S | D | F | D | E | A | V | L | Q | F | G | K | S | M | E | V | I | D | K | R |
| <i>Xenopus laevis</i>                  | A | E | T | H | Y | H | L | G | L | A | Y | Q | Y | S | S | K | H | E | D | A | I | S | H | F | T | Q | S | V | G | V | I | E | K | R |
| <i>Xenopus tropicalis</i>              | A | E | T | N | Y | H | L | G | L | A | Y | Q | Y | S | S | K | H | E | D | A | I | S | H | F | T | Q | S | V | G | V | I | E | K | R |
| <i>Salmo salar</i>                     | A | E | T | H | Y | Q | L | G | L | T | L | C | S | D | C | Q | Y | S | Q | A | I | E | H | F | N | H | S | A | R | V | I | K | S | R |
| <i>Danio rerio</i>                     | T | E | T | H | Y | Q | L | G | T | T | Y | S | Y | T | T | Q | Y | N | Q | A | I | E | H | F | S | N | S | I | K | V | I | E | S | R |
| <i>Maylandia zebra</i>                 | A | E | T | H | Y | H | V | A | T | T | L | C | Y | M | D | Q | Y | S | Q | A | I | Q | H | Y | N | S | S | I | K | V | I | E | T | R |
| <i>Oreochromis niloticus</i>           | A | E | T | H | Y | Q | L | G | V | T | Y | S | L | N | T | Q | Y | S | E | A | I | E | S | L | K | S | S | I | I | K | N | R |   |   |
| <i>Takifugu rubripes</i>               | A | E | T | H | Y | H | V | A | T | T | L | C | Y | M | D | K | Y | S | Q | A | I | Q | H | Y | N | S | S | I | E | V | I | E | K | R |
| <i>Halocynthia roretzi</i>             | A | E | T | Y | Y | N | L | G | L | A | Y | S | F | E | K | R | Y | D | N | A | L | E | H | Y | Q | S | A | L | D | V | L | E | A | R |
| <i>Ciona intestinalis</i>              | A | E | T | H | Y | N | L | G | L | A | Y | T | F | D | K | R | Y | D | N | A | L | E | H | Y | T | A | S | L | N | V | L | D | A | R |
| <i>Tribolium castaneum</i>             | A | E | T | C | Y | K | L | G | G | A | Y | S | T | N | G | Q | I | D | E | A | I | A | S | F | N | S | S | Y | E | Y | L | Q | N | K |
| <i>Danaus plexippus</i>                | A | E | T | H | Y | Q | I | G | L | A | N | S | L | A | S | N | F | E | D | A | I | T | H | F | K | N | A | A | N | I | L | E | T | R |
| <i>Bombus terrestris</i>               | A | E | I | H | Y | Q | L | A | L | A | H | S | L | G | N | E | F | D | A | S | I | E | E | F | N | K | A | T | E | L | L | D | S | R |
| <i>Megachile rotundata</i>             | A | E | I | H | Y | Q | L | A | L | A | H | S | L | G | N | E | F | D | A | S | I | E | E | F | N | K | A | T | E | L | L | E | A | R |
| <i>Apis florea</i>                     | A | E | I | H | Y | Q | L | A | L | A | H | S | L | G | N | E | F | D | A | S | I | E | E | F | N | K | A | T | E | L | L | E | T | R |
| <i>Drosophila melanogaster</i>         | A | E | L | H | Y | K | I | G | L | T | Y | L | M | Q | Q | L | N | K | E | G | A | T | A | L | R | Q | S | S | V | L | I | E | E | E |
| <i>Drosophila sechellia</i>            | A | E | L | H | Y | K | I | G | L | T | Y | L | M | Q | Q | L | N | K | E | G | A | T | A | L | R | Q | S | S | V | L | I | E | E | E |
| <i>Drosophila erecta</i>               | A | E | L | H | Y | K | I | G | L | T | Y | L | M | Q | Q | L | N | K | E | G | A | T | A | L | R | H | S | S | V | L | I | E | E | E |
| <i>Caenorhabditis elegans</i>          | A | C | T | Y | I | L | I | G | N | A | C | A | S | D | A | N | Y | D | E | T | V | Q | Y | F | G | K | T | K | D | V | L | I | A | R |
| <i>Caenorhabditis remanei</i>          | A | C | T | Y | I | L | M | A | S | A | C | S | S | S | M | N | F | T | D | A | V | T | F | Y | K | R | T | K | D | T | L | V | A | R |
| <i>Caenorhabditis brenneri</i>         | S | Q | T | Y | I | L | M | A | N | A | C | S | N | A | M | N | F | E | E | A | V | A | L | Y | Q | K | T | K | E | S | L | H | R |   |
| <i>Caenorhabditis briggsae</i>         | A | C | T | Y | I | L | M | A | D | A | C | T | S | G | M | N | Y | D | E | A | I | N | Y | F | E | K | T | K | E | T | L | K | S | R |
| <i>Tetrahymena thermophila</i>         | S | S | I | F | F | Q | L | G | N | A | V | L | Y | E | N | K | E | C | E | E | E | G | L | K | N | F | I | D | S | A | Q | I | L |   |
| <i>Ichthyophthirius multifiliis</i>    | S | S | I | Y | F | Q | L | G | N | S | L | L | Y | E | N | K | E | F | C | E | E | N | S | L | K | N | F | I | Q | S | A | Q | I | L |
| <i>Paramecium tetraurelia</i>          | A | E | T | Y | F | F | L | G | N | V | T | L | Y | N | Y | K | E | G | K | E | E | E | A | L | G | F | Y | L | K | A | L | Q | I | L |
| <i>Plasmodium yoelii</i>               | S | Q | S | Y | M | F | C | G | K | R | K | E | A | V | E | Y | F | E | K | V | K | K | I | L | L | D | V | R | Q | K | T | T | P | L |
| <i>Neospora caninum</i>                | A | Q | A | T | F | F | S | G | K | K | A | A | L | D | V | F | K | R | T | L | S | I | G | K | Q | I | K | E | G | E | L | G | M |   |
| <i>Toxoplasma gondii</i>               | A | Q | A | T | F | F | S | G | K | K | A | A | L | D | V | F | K | R | T | L | A | I | G | K | K | I | K | D | G | F | L | G | M |   |
| <i>Albugo laibachii</i>                | A | D | L | Y | C | C | L | A | I | S | C | I | Y | Q | D | P | E | E | G | L | K | Y | Y | V | L | A | G | R | V | M | A | E | N |   |
| <i>Thalassiosira pseudonana</i>        | A | D | A | H | F | S | L | A | Q | A | Y | V | E | A | P | N | R | E | K | S | C | D | H | Y | L | A | C | G | V | S | F | A | G | L |
| <i>Schizosaccharomyces pombe</i>       | S | E | A | H | Y | K | L | A | L | A | L | E | F | T | N | P | K | S | R | A | C | E | H | V | E | K | A | A | E | I | L | K | N | V |
| <i>Trichosporon asahii</i>             | A | S | A | E | Y | Q | L | G | T | A | L | E | F | T | P | S | R | P | A | A | L | V | H | V | Q | A | A | L | D | G | F | K | A | R |
| <i>Saccharomyces cerevisiae</i>        | I | Q | A | E | F | L | V | C | D | A | L | R | W | V | D | Q | V | K | D | K | L | K | R | F | K | H | A | K | A | L | L | E | K | H |
| <i>Schizosaccharomyces japonicus</i>   | S | E | A | H | Y | K | L | A | L | A | L | E | F | T | A | L | K | E | A | L | K | H | V | E | A | A | A | D | I | I | Q | H | V | L |
| <i>Tetrapisispora phaffii</i>          | L | T | T | S | L | K | L | I | E | A | L | R | W | L | T | D | T | K | D | K | H | K | E | I | L | N | S | T | Q | I | L | L | K | K |
| <i>Cryptococcus gattii</i>             | A | S | A | H | Y | Q | L | A | T | A | L | E | F | T | P | S | R | T | S | A | L | T | H | V | E | S | A | L | S | S | L | V | R | R |
| <i>Candida albicans</i>                | S | E | S | H | Y | K | L | A | L | A | L | E | F | Q | S | D | K | N | A | A | E | Q | M | K | L | A | I | E | S | V | E | R | R | N |
| <i>Coccidioides immitis</i>            | A | E | C | H | Y | K | L | S | L | A | L | E | F | S | S | V | R | A | E | A | A | K | H | M | E | A | A | I | Q | C | C | K | L | R |
| <i>Neurospora crassa</i>               | A | E | A | H | F | K | L | S | L | A | L | E | F | A | S | V | D | E | A | A | A | E | L | E | A | A | I | A | S | T | K | L | K | L |
| <i>Arabidopsis thaliana</i>            | A | E | L | N | F | R | I | C | I | C | L | E | T | G | C | Q | P | K | E | A | I | P | Y | C | Q | K | A | L | I | C | K | A | R |   |
| <i>Capsella rubella</i>                | A | E | L | N | F | R | I | C | I | C | L | E | T | G | C | Q | P | K | E | A | M | P | Y | C | Q | K | A | M | L | I | C | K | A | R |
| <i>Theobroma cacao</i>                 | A | E | L | N | F | R | I | C | M | C | L | E | I | G | S | K | P | Q | E | A | I | P | Y | C | Q | K | A | I | S | V | C | R | S | R |
| <i>Cicer arietinum</i>                 | A | D | L | N | F | R | I | C | L | C | L | E | V | G | S | R | P | E | E | A | V | A | Y | C | E | K | A | T | S | V | C | K | A | R |
| <i>Choanoflagellida Salpingoecidae</i> | A | C | A | L | F | Q | L | G | I | A | H | R | Q | L | K | Q | S | Q | K | A | I | A | A | F | S | E | A | V | D | I | L | D | A | L |
| <i>Dictyostelium fasciculatum</i>      | A | E | V | Y | Y | I | G | M | V | Q | I | K | N | D | A | K | F | A | E | D | S | Y | K | K | A | I | E | I | L | T | G | A |   |   |
| <i>Trypanosoma cruzi</i>               | A | A | V | L | Y | G | I | A | D | C | Y | M | K | E | G | D | F | E | G | A | E | E | R | F | Q | A | A | L | D | E | L | A | S | F |
| <i>Trypanosoma brucei</i>              | A | A | V | L | Y | E | I | A | D | C | Y | M | K | E | G | D | F | E | G | A | E | E | R | F | I | K | A | I | E | E | I | E | K | F |

Supplementary Figure S1-E

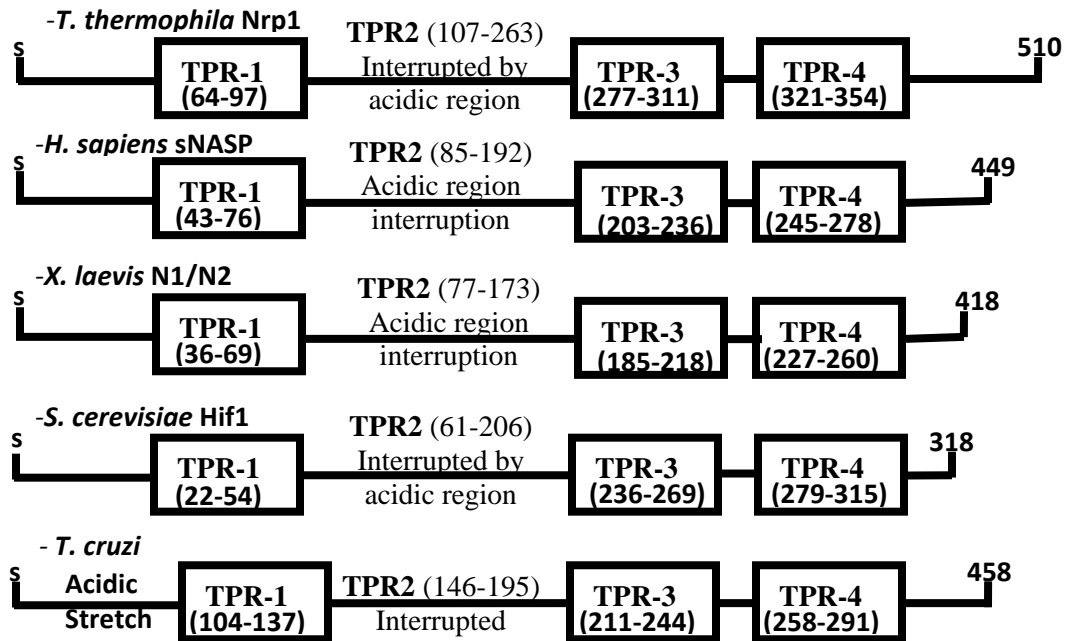

Supplement: 1471-2148-14-139-S3.pdf [file 1471-2148-14-139-S3.pdf]
