# Supplementary material for: Molecular evolution of NASP and conserved histone H3/H4 transport pathway
Source: PubMed Central journal article supplement (PMC4082323; doi:10.1186/1471-2148-14-139), 2014-06-20
Supplement: 1471-2148-14-139-S1.pdf [file 1471-2148-14-139-S1.pdf]

**Supplementary Table1:** Accession number of the sequences used in this study

| <b>Species</b>                            | <b>Accession</b>   | <b>Taxonomic Group</b>    |
|-------------------------------------------|--------------------|---------------------------|
| <i>Gallus gallus</i>                      | CAG30998.1         | Aves/Chordata             |
| <i>Mus musculus</i>                       | NP_001074944.1     | Mammalia/Chordata         |
| <i>Salmo salar</i>                        | NP_001167378.1     | Actinopterygii / Chordata |
| <i>Xenopus laevis</i>                     | AAI70018.1         | Amphibia/Chordata         |
| <i>Xenopus laevis (V-2)</i>               | AAH77440.1         | Amphibia/Chordata         |
| <i>Xenopus laevis (V-3)</i>               | CAA28419.1         | Amphibia/Chordata         |
| <i>Xenopus tropicalis</i>                 | NP_001164988.1     | Amphibia/Chordata         |
| <i>Homo sapiens</i>                       | NP_689511.2        | Mammalia/Chordata         |
| <i>Bos taurus</i>                         | XP_005204766.1     | Mammalia/Chordata         |
| <i>Orcinus orca</i>                       | XP_004285798.1     | Mammalia/Chordata         |
| <i>Maylandia zebra</i>                    | XP_004562165.1     | Actinopterygii / Chordata |
| <i>Taeniopygia guttata</i>                | XP_004174360.1     | Aves/Chordata             |
| <i>Homo sapiens (tNASP)</i>               | NM_001195193.1     | Mammalia/Chordata         |
| <i>Homo sapiens (tNASP-V2)</i>            | NM_002482.3        | Mammalia/Chordata         |
| <i>Danio rerio</i>                        | NP_956076.1        | Actinopterygii / Chordata |
| <i>Xiphophorus maculatus (NASP2)</i>      | ENSXMAG00000011059 | Actinopterygii / Chordata |
| <i>Xiphophorus maculatus (NASP1)</i>      | ENSXMAG00000018420 | Actinopterygii / Chordata |
| <i>Taeniopygia guttata</i>                | ENSTGUT00000008366 | Aves/Chordata             |
| <i>Taeniopygia guttata (NASP2)</i>        | ENSTGUT00000017166 | Aves/Chordata             |
| <i>Felis catus</i>                        | XM_003990037.1     | Mammalia/Chordata         |
| <i>Oryzias latipes (NASP2)</i>            | ENSORLG00000011095 | Actinopterygii / Chordata |
| <i>Felis catus (NASP2)</i>                | ENSFCAT00000023663 | Mammalia/Chordata         |
| <i>Gorilla gorilla (tNASP)</i>            | ENSGGOT00000033308 | Mammalia/Chordata         |
| <i>Gorilla gorilla (NASP2)</i>            | ENSGGOT00000028193 | Mammalia/Chordata         |
| <i>Oryzias latipes (NASP1)</i>            | ENSORLG00000010548 | Actinopterygii / Chordata |
| <i>Gasterosteus aculeatus (NASP2)</i>     | ENSGACG00000006499 | Actinopterygii / Chordata |
| <i>Gasterosteus aculeatus (NASP1)</i>     | ENSGACG00000016167 | Actinopterygii / Chordata |
| <i>Oreochromis niloticus (NASP2)</i>      | ENSONIG00000008932 | Actinopterygii / Chordata |
| <i>Oreochromis niloticus (NASP1)</i>      | XP_003453360.1     | Actinopterygii / Chordata |
| <i>Takifugu rubripes (NASP2)</i>          | XP_003974435.1     | Actinopterygii / Chordata |
| <i>Takifugu rubripes (NASP1)</i>          | ENSTRUG00000012389 | Actinopterygii / Chordata |
| <i>Tetraodon nigroviridis (NASP2)</i>     | ENSTNIG00000018075 | Actinopterygii / Chordata |
| <i>Tetraodon nigroviridis (NASP1)</i>     | ENSTNIG00000006947 | Actinopterygii / Chordata |
| <i>Gadus morhua (Atlantic cod)(NASP2)</i> | ENSGMOG00000008773 | Actinopterygii / Chordata |
| <i>Gadus morhua (Atlantic cod)(NASP1)</i> | ENSGMOG00000011853 | Actinopterygii / Chordata |
| <i>Ictidomys tridecemlineatus (NASP1)</i> | I3MSG5             | Mammalia/Chordata         |
| <i>Ictidomys tridecemlineatus (NASP2)</i> | I3NEY0             | Mammalia/Chordata         |
| <i>Halocynthia roretzi</i>                | Q02508.1           | Tunicates                 |
| <i>Ciona intestinalis</i>                 | XP_002120883.2     | Tunicates                 |
| <i>Tribolium castaneum</i>                | XP_970862.2        | Arthropods                |
| <i>Megachile rotundata</i>                | XP_003708323.1     | Arthropods                |
| <i>Danaus plexippus</i>                   | EJH78545.1         | Arthropods                |
| <i>Apis florea</i>                        | XP_003694981.1     | Arthropods                |
| <i>Bombus terrestris</i>                  | XP_003400722.1     | Arthropods                |
| <i>Drosophila melanogaster</i>            | NP_649828.1        | Arthropods                |

|                                          |                |                                         |
|------------------------------------------|----------------|-----------------------------------------|
| <i>Drosophila sechellia</i>              | XP_002031992.1 | Arthropods                              |
| <i>Drosophila erecta</i>                 | XP_001980917.1 | Arthropods                              |
| <i>Caenorhabditis elegans (NASP1)</i>    | NP_496380.1    | Nematoda                                |
| <i>Caenorhabditis elegans (NASP2)</i>    | NP_506298.1    | Nematoda                                |
| <i>Caenorhabditis remanei</i>            | XP_003117223.1 | Nematoda                                |
| <i>Caenorhabditis brenneri</i>           | EGT44801.1     | Nematoda                                |
| <i>Caenorhabditis briggsae (NASP1)</i>   | XP_002631180.1 | Nematoda                                |
| <i>Caenorhabditis briggsae (NASP2)</i>   | XP_002637622.1 | Nematoda                                |
| <i>Caenorhabditis brenneri (NASP2)**</i> | EGT53840.1     | Nematoda                                |
| <i>Caenorhabditis remanei (NASP2)**</i>  | XP_003104429.1 | Nematoda                                |
| <i>Cryptococcus gattii</i>               | XP_003191095.1 | Fungi                                   |
| <i>Trichosporon asahii var. asahii</i>   | EKD02263.1     | Fungi                                   |
| <i>Tetrapisispora phaffii</i>            | XP_003687774.1 | Fungi                                   |
| <i>Neurospora crassa</i>                 | XP_961229.1    | Fungi                                   |
| <i>Schizosaccharomyces pombe</i>         | NP_595313.1    | Fungi                                   |
| <i>Coccidioides immitis</i>              | XP_001243327.1 | Fungi                                   |
| <i>Saccharomyces cerevisiae</i>          | NP_013078.1    | Fungi                                   |
| <i>Candida albicans</i>                  | XP_712231.1    | Fungi                                   |
| <i>Schizosaccharomyces japonicus</i>     | XP_002175640.1 | Fungi                                   |
| <i>Tremella fuciformis**</i>             | ADE10090.1     | Fungi                                   |
| <i>Candida glabrata**</i>                | XP_446527.1    | Fungi                                   |
| <i>Arabidopsis thaliana</i>              | NP_568019.1    | Plants                                  |
| <i>Capsella rubella</i>                  | EOA15483.1     | Plants                                  |
| <i>Theobroma cacao</i>                   | EOX91255.1     | Plants                                  |
| <i>Cicer arietinum</i>                   | XP_004511989.1 | Plants                                  |
| <i>Tetrahymena thermophila</i>           | XP_001030823.3 | Ciliates                                |
| <i>Ichthyophthirius multifiliis</i>      | XP_004027727.1 | Ciliates                                |
| <i>Paramecium tetraurelia</i>            | XP_001456110.1 | Ciliates                                |
| <i>Plasmodium yoelii</i>                 | XP_729565.1    | Apicomplexans                           |
| <i>Neospora caninum</i>                  | XP_003882797.1 | Apicomplexans                           |
| <i>Toxoplasma gondii</i>                 | XP_002365332.1 | Apicomplexans                           |
| <i>Babesia bovis**</i>                   | XP_001609366.1 | Apicomplexans                           |
| <i>Albugo laibachii</i>                  | CCA18837.1     | Oomycete                                |
| <i>Thalassiosira pseudonana</i>          | XP_002294415.1 | Diatom                                  |
| <i>Choanoflagellida_Salpingoecidae</i>   | XP_004991759.1 | <i>Choanoflagellates</i>                |
| <i>Dictyostelium fasciculatum</i>        | XP_004362161.1 | Amoebozoa                               |
| <i>Dictyostelium discoideum**</i>        | XM_629896.1    | Amoebozoa                               |
| <i>Acanthamoeba castellanii**</i>        | XP_004341330.1 | Amoebozoa                               |
| <i>Acanthamoeba castellanii**</i>        | XM_004341282.1 | Amoebozoa                               |
| <i>Nannochloropsis gaditana**</i>        | EKU20698.1     | Alga                                    |
| <i>Guillardia theta**</i>                | EKX34129.1     | Cryptophyta                             |
| <i>Trypanosoma cruzi</i>                 | XP_810178.1    | Kinetoplastids/Excavata                 |
| <i>Trypanosoma brucei</i>                | CBH18038.1     | Kinetoplastids/Excavata                 |
| <i>Trichomonas vaginalis**</i>           | A2DW29         | Parabasalia/Trichomonadida<br>/Excavata |

\*\* Not included in the phylogeny reconstruction; V stands for variant

**Supplementary Table2:** Average number of amino acid and nucleotide variations among different regions of the NASP proteins discriminating various taxonomic groups

|             |               | $p_{AA}(SE)$ | $p_{NT}(SE)$ | $p_S(SE)$   | $p_N(SE)$   | $R^a$             | Z-test <sup>b</sup>  |
|-------------|---------------|--------------|--------------|-------------|-------------|-------------------|----------------------|
| Vertebrate  | TPRs only     | 0.308±0.023  | 0.305±0.013  | 0.595±0.018 | 0.200±0.015 | 1.14              | 16.06 <sup>***</sup> |
|             | Acidic only   | 0.525±0.038  | 0.394±0.015  | 0.598±0.018 | 0.334±0.024 | 1.02 <sup>#</sup> | 7.216 <sup>***</sup> |
|             | Other Regions | 0.439±0.023  | 0.388±0.011  | 1.670±0.078 | 0.403±0.032 | 0.92              | 14.75 <sup>***</sup> |
| Tunicata    | TPRs only     | 0.309±0.039  | 0.353±0.023  | 0.740±0.048 | 0.217±0.028 | 0.92              | 9.387 <sup>***</sup> |
|             | Acidic only   | 0.750±0.036  | 0.466±0.021  | 0.630±0.052 | 0.416±0.031 | 1.07 <sup>#</sup> | 3.381 <sup>***</sup> |
|             | Other Regions | 0.507±0.042  | 0.480±0.023  | 0.796±0.056 | 0.385±0.033 | 0.69              | 5.938 <sup>***</sup> |
| Arthropoda  | TPRs only     | 0.511±0.022  | 0.426±0.013  | 0.60±0.018  | 0.361±0.019 | 1.19              | 7.541 <sup>***</sup> |
|             | Acidic only   | 0.648±0.021  | 0.524±0.011  | 0.639±0.017 | 0.490±0.016 | 0.89 <sup>#</sup> | 6.373 <sup>***</sup> |
|             | Other Regions | 0.499±0.023  | 0.440±0.014  | 0.645±0.019 | 0.372±0.020 | 1.02              | 9.054 <sup>***</sup> |
| Nematoda    | TPRs only     | 0.350±0.029  | 0.337±0.017  | 0.630±0.032 | 0.230±0.023 | 1.13              | 9.583 <sup>***</sup> |
|             | Acidic only   | 0.728±0.043  | 0.531±0.029  | 0.757±0.054 | 0.473±0.037 | 0.65 <sup>#</sup> | 3.627 <sup>***</sup> |
|             | Other Regions | 0.425±0.030  | 0.371±0.015  | 0.686±0.032 | 0.273±0.021 | 1.07              | 11.24 <sup>***</sup> |
| Fungi       | TPRs only     | 0.696±0.019  | 0.557±0.011  | 0.758±0.013 | 0.494±0.016 | 0.58              | 11.75 <sup>***</sup> |
|             | Acidic only   | 0.833±0.021  | 0.634±0.011  | 0.770±0.016 | 0.599±0.017 | 0.54 <sup>#</sup> | 6.551 <sup>***</sup> |
|             | Other Regions | 0.768±0.024  | 0.605±0.013  | 0.779±0.018 | 0.556±0.021 | 0.58              | 7.472 <sup>***</sup> |
| Plants      | TPRs only     | 0.251±0.027  | 0.311±0.022  | 0.621±0.053 | 0.206±0.025 | 0.86              | 7.047 <sup>***</sup> |
|             | Acidic only   | 0.609±0.036  | 0.571±0.031  | 0.663±0.075 | 0.547±0.039 | 0.45              | 1.366 <sup>*</sup>   |
|             | Other Regions | 0.506±0.022  | 0.400±0.013  | 0.620±0.027 | 0.327±0.016 | 0.80              | 9.218 <sup>***</sup> |
| Ciliates    | TPRs only     | 0.593±0.030  | 0.451±0.017  | 0.661±0.039 | 0.395±0.024 | 0.69              | 5.116 <sup>***</sup> |
|             | Acidic only   | 0.862±0.033  | 0.444±0.026  | 0.546±0.058 | 0.422±0.038 | 0.53 <sup>#</sup> | 1.835 <sup>**</sup>  |
|             | Other Regions | 0.633±0.027  | 0.479±0.015  | 0.654±0.036 | 0.440±0.020 | 0.55              | 4.866 <sup>***</sup> |
| Apicomplexa | TPRs only     | 0.685±0.022  | 0.519±0.013  | 0.686±0.023 | 0.467±0.019 | 0.71              | 7.066 <sup>***</sup> |
|             | Acidic only   | 0.779±0.039  | 0.529±0.032  | 0.729±0.051 | 0.461±0.042 | 0.69              | 3.358 <sup>**</sup>  |
|             | Other Regions | 0.646±0.019  | 0.528±0.012  | 0.687±0.022 | 0.476±0.017 | 0.72              | 6.887 <sup>***</sup> |
| Euglenozoa  | TPRs only     | 0.265±0.038  | 0.289±0.022  | 0.646±0.051 | 0.174±0.026 | 0.76              | 8.156 <sup>***</sup> |
|             | Other Regions | 0.444±0.029  | 0.410±0.020  | 0.745±0.037 | 0.300±0.023 | 0.92              | 9.998 <sup>***</sup> |

$p_{AA}$ ,  $p_{NT}$ ,  $p_S$ , and  $p_N$ , represent average number of amino acid, nucleotide, synonymous and non-synonymous nucleotide differences per site along with Z-test of selection. SE indicates standard error based on 1000 bootstrap replicates.

<sup>a</sup> average transition/transversion ratio

<sup>#</sup> Calculation performed using pair wise deletion

<sup>b</sup>  $H_1: p_N < p_S$  and  $H_0: p_N = p_S$

<sup>\*\*\*</sup>  $P < 0.001$ ; <sup>\*\*</sup>  $P < 0.05$ ; <sup>\*</sup>  $P < 0.1$

**NOTE:** Remaining region encompasses all sites excluding TPRs 1-4 and acidic interruption region of TPR2

**Supplementary Table3:** Average number of amino acid among different TPRs discriminating various taxonomic groups

|                | <b>TPR1(SE)</b><br><i>pAA</i> | <b>TPR2(SE)</b><br><i>pAA</i> | <b>TPR3(SE)</b><br><i>pAA</i> | <b>TPR4(SE)</b><br><i>pAA</i> |
|----------------|-------------------------------|-------------------------------|-------------------------------|-------------------------------|
| Vertebrate     | 0.313±0.043                   | 0.392±0.03                    | 0.273±0.049                   | 0.428±0.048                   |
| Tunicata       | 0.559±0.086                   | 0.400±0.047                   | 0.206±0.070                   | 0.235±0.069                   |
| Arthropoda     | 0.505±0.038                   | 0.567±0.023                   | 0.567±0.046                   | 0.577±0.040                   |
| Nematoda       | 0.377±0.054                   | 0.452±0.038                   | 0.294±0.059                   | 0.456±0.064                   |
| Fungi          | 0.761±0.027                   | 0.741±0.022                   | 0.646±0.041                   | 0.663±0.043                   |
| Plants         | 0.284±0.055                   | 0.404±0.034                   | 0.206±0.048                   | 0.284±0.062                   |
| Chromalveolata | 0.824±0.021                   | 0.669±0.034                   | 0.694±0.037                   | 0.805±0.022                   |
| Euglenozoa     | 0.412±0.084                   | 0.180±0.054                   | 0.294±0.076                   | 0.235±0.073                   |

*pAA* represents average number of amino acid variation and SE denotes standard error calculated based on 1000 bootstrap replicates

**Supplementary Table 4:** Number of acidic residues (Asp + Glu) and theoretical iso-electric points distinguishing between the entire protein and acidic regions for various NASP proteins

| <b>Species</b>                      | <b>Whole protein (Asp + Glu)/<br/>Theoretical pI</b> | <b>TPR2-Acidic region (Asp +<br/>Glu)/ Theoretical pI</b> |
|-------------------------------------|------------------------------------------------------|-----------------------------------------------------------|
| <i>Tetrahymena thermophila</i>      | 110/ 4.58                                            | 40/4.12                                                   |
| <i>Saccharomyces cerevisiae</i>     | 78/ 4.64                                             | 45/3.71                                                   |
| <i>Coccidioides immitis</i>         | 84/ 4.64                                             | 31/4.24                                                   |
| <i>Schizosaccharomyces pombe</i>    | 76/ 4.76                                             | 23/4.28                                                   |
| <i>Neurospora crassa</i>            | 105/ 4.58                                            | 41/4.49                                                   |
| <i>Tetrapisispora phaffii</i>       | 105/ 4.07                                            | 56/3.38                                                   |
| <i>Trichosporon asahii</i>          | 82/ 4.63                                             | 30/3.84                                                   |
| <i>Cryptococcus gattii</i>          | 79/ 4.40                                             | 28/3.63                                                   |
| <i>Tribolium castaneum</i>          | 79/ 4.42                                             | 38/4.09                                                   |
| <i>Megachile rotundata</i>          | 106/ 4.54                                            | 61/4.27                                                   |
| <i>Danaus plexippus</i>             | 86/ 4.46                                             | 42/3.85                                                   |
| <i>Apis florea</i>                  | 113/ 4.50                                            | 68/4.22                                                   |
| <i>Bombus terrestris</i>            | 115/ 4.44                                            | 70/4.13                                                   |
| <i>Drosophila melanogaster</i>      | 102/ 4.30                                            | 48/3.89                                                   |
| <i>Drosophila sechellia</i>         | 103/ 4.30                                            | 49/3.88                                                   |
| <i>Drosophila erecta</i>            | 102/ 4.32                                            | 48/3.94                                                   |
| <i>Danio rerio</i>                  | 164/ 4.40                                            | 111/4.14                                                  |
| <i>Salmo salar</i>                  | 98/ 4.53                                             | 55/4.08                                                   |
| <i>Oreochromis niloticus</i>        | 139/ 4.37                                            | 88/4.12                                                   |
| <i>Takifugu rubripes</i>            | 105/ 4.37                                            | 52/4.19                                                   |
| <i>Xenopus laevis</i>               | 152/ 4.42                                            | 89/4.15                                                   |
| <i>Xenopus tropicalis</i>           | 155/ 4.38                                            | 93/4.11                                                   |
| <i>Homo sapiens</i>                 | 99/ 4.35                                             | 35/3.95                                                   |
| <i>Caenorhabditis elegans</i>       | 95 /4.34                                             | 30/3.87                                                   |
| <i>Caenorhabditis remanei</i>       | 95 /4.31                                             | 30/3.93                                                   |
| <i>Caenorhabditis brenneri</i>      | 85 /4.30                                             | 31/3.99                                                   |
| <i>Caenorhabditis briggsae</i>      | 89 /4.38                                             | 23/3.98                                                   |
| <i>Ichthyophthirius multifiliis</i> | 91 /4.81                                             | 24/4.26                                                   |
| <i>Paramecium tetraurelia</i>       | 86 /4.60                                             | 27/4.11                                                   |
| <i>Halocynthia roretzi</i>          | 119/ 4.67                                            | 54/4.40                                                   |
| <i>Ciona intestinalis</i>           | 117 /4.57                                            | 74/4.46                                                   |
| <i>Mus musculus</i>                 | 98 /4.42                                             | 35/4.04                                                   |
| <i>Gallus gallus</i>                | 82 /4.79                                             | 36/3.94                                                   |
| <i>Plasmodium yoelii</i>            | 75 /4.59                                             | 19/4.41                                                   |
| <i>Toxoplasma gondii</i>            | 95 /4.59                                             | 17/4.50                                                   |
| <i>Arabidopsis thaliana</i>         | 96 /4.28                                             | 28/3.89                                                   |
| <i>Capsella rubella</i>             | 96 /4.47                                             | 28/4.04                                                   |
| <i>Theobroma cacao</i>              | 95 /4.37                                             | 33/4.12                                                   |
| <i>Cicer arietinum</i>              | 90 /4.46                                             | 27/4.22                                                   |
| <i>Trypanosoma cruzi</i>            | 100/ 4.48                                            | -                                                         |
| <i>Trypanosoma brucei</i>           | 76 /4.60                                             | -                                                         |
| <i>Bos taurus</i>                   | 101/ 4.36                                            | 35/3.98                                                   |
| <i>Orcinus orca</i>                 | 101 /4.36                                            | 35/3.98                                                   |

|                                        |          |         |
|----------------------------------------|----------|---------|
| <i>Albugo laibachii</i>                | 90 /4.84 | 18/4.40 |
| <i>Thalassiosira pseudonana</i>        | 94 /4.51 | 23/3.66 |
| <i>Maylandia zebra</i>                 | 89 /4.26 | 37/3.75 |
| <i>Taeniopygia guttata</i>             | 83 /4.86 | 36/3.92 |
| <i>Candida albicans</i>                | 93 /4.41 | 36/3.84 |
| <i>Schizosaccharomyces japonicus</i>   | 70 /4.69 | 22/4.38 |
| <i>Choanoflagellida Salpingoecidae</i> | 70 /4.85 | 32/3.98 |
| <i>Dictyostelium fasciculatum</i>      | 87 /4.72 | 25/4.28 |
| <i>Neospora caninum</i>                | 98/4.59  | 17/4.55 |

**Supplementary Table5:** Average number of amino acid and nucleotide variations among different regions of the NASP for various lineage specific paralogs

|          |               | $p_{AA}(SE)$ | $p_{NT}(SE)$ | $p_S(SE)$   | $p_N(SE)$   | $R^a$ | Z-test <sup>b</sup>  |
|----------|---------------|--------------|--------------|-------------|-------------|-------|----------------------|
| Fish     | TPRs only     | 0.232±0.023  | 0.253±0.011  | 0.525±0.019 | 0.152±0.016 | 1.03  | 13.68 <sup>***</sup> |
|          | Acidic only   | 0.383±0.039  | 0.329±0.019  | 0.577±0.032 | 0.251±0.030 | 0.93  | 8.326 <sup>***</sup> |
|          | Other Regions | 0.344±0.030  | 0.309±0.014  | 0.555±0.022 | 0.225±0.020 | 0.93  | 12.05 <sup>***</sup> |
| Nematoda | TPRs only     | 0.461±0.031  | 0.403±0.016  | 0.673±0.026 | 0.311±0.022 | 0.87  | 10.66 <sup>***</sup> |
|          | Acidic only   | 0.719±0.031  | 0.495±0.024  | 0.694±0.039 | 0.440±0.030 | 0.75  | 5.088 <sup>***</sup> |
|          | Other Regions | 0.579±0.027  | 0.448±0.016  | 0.674±0.026 | 0.377±0.020 | 0.84  | 9.048 <sup>***</sup> |

$p_{AA}$ ,  $p_{NT}$ ,  $p_S$ , and  $p_N$ , represent average number of amino acid, nucleotide, synonymous and non-synonymous nucleotide differences per site along with Z-test of selection. SE indicates standard error based on 1000 bootstrap replicates.

<sup>a</sup> average transition/transversion ratio

<sup>b</sup>  $H_1: p_N < p_S$  and  $H_0: p_N = p_S$

<sup>\*\*\*</sup>  $P < 0.001$

Note: A pair wise comparison for each pair of sequences (NASP1/2) in these lineages was also carried out (not shown; See text for details).

**Supplementary Table6:** Average number of amino acid and nucleotide variations among different regions of the NASP for various lineage specific paralogs using pair wise comparisons

|                                        |                          | $p_{AA}(SE)$ | $p_{NT}(SE)$ | $p_S(SE)$   | $p_N(SE)$   | $R^a$ | Z-test <sup>b</sup> |
|----------------------------------------|--------------------------|--------------|--------------|-------------|-------------|-------|---------------------|
| <i>I. tridecemlineatus</i><br>Paralogs | TPRs only                | 0.187±0.035  | 0.117±0.016  | 0.169±0.035 | 0.096±0.018 | 1.68  | N/A <sup>†</sup>    |
|                                        | Acidic only              | 0.178±0.045  | 0.132±0.022  | 0.207±0.060 | 0.111±0.029 | 0.93  | 1.488 <sup>*</sup>  |
|                                        | Other Regions            | 0.211±0.027  | 0.105±0.011  | 0.095±0.020 | 0.107±0.014 | 2.13  | N/A <sup>†</sup>    |
| <i>G. gorilla</i><br>Paralogs          | TPRs only                | 0.105±0.033  | 0.050±0.013  | 0.033±0.020 | 0.058±0.019 | 2.25  | N/A <sup>†</sup>    |
|                                        | Acidic only <sup>‡</sup> | 0.096±0.017  | 0.038±0.007  | 0.016±0.008 | 0.046±0.008 | 1.82  | 2.59 <sup>**</sup>  |
|                                        | Other Regions            | 0.215±0.028  | 0.143±0.014  | 0.155±0.026 | 0.139±0.019 | 0.92  | N/A <sup>†</sup>    |

$p_{AA}, p_{NT}, p_S,$  and  $p_N$ , represent average number of amino acid, nucleotide, synonymous and non-synonymous nucleotide differences per site along with Z-test of selection. SE indicates standard error based on 1000 bootstrap replicates.

<sup>a</sup> average transition/transversion ratio

<sup>b</sup>  $H_1: p_N < p_S$  and  $H_0: p_N = p_S$

\*\* P<0.05; \* P<0.1

† Null hypothesis of  $p_N = p_S$  could not be rejected

‡ Test of Positive selection;  $H_1: p_N > p_S$  and  $H_0: p_N = p_S$

\*\* P<0.05
