# Supplementary material for: Molecular evolution of NASP and conserved histone H3/H4 transport pathway
Source: PubMed Central journal article supplement (PMC4082323; doi:10.1186/1471-2148-14-139), 2014-06-20

## Supplementary Figure S5

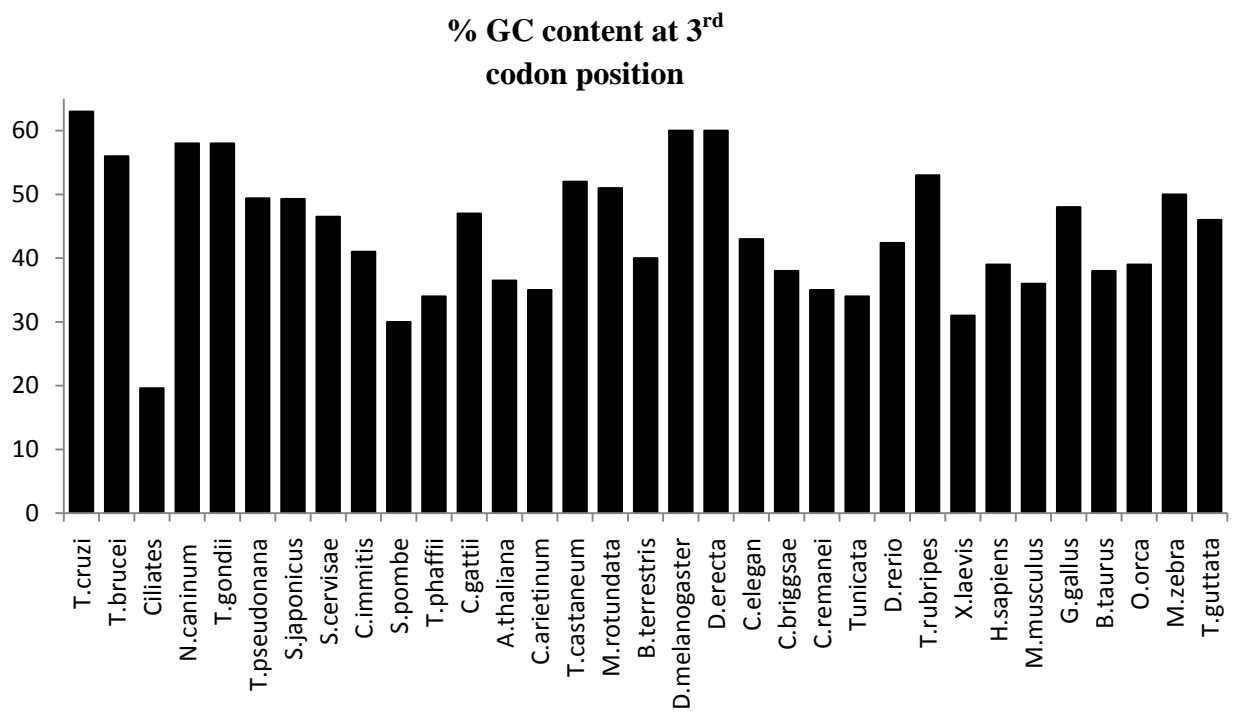

Supplementary Figure S6

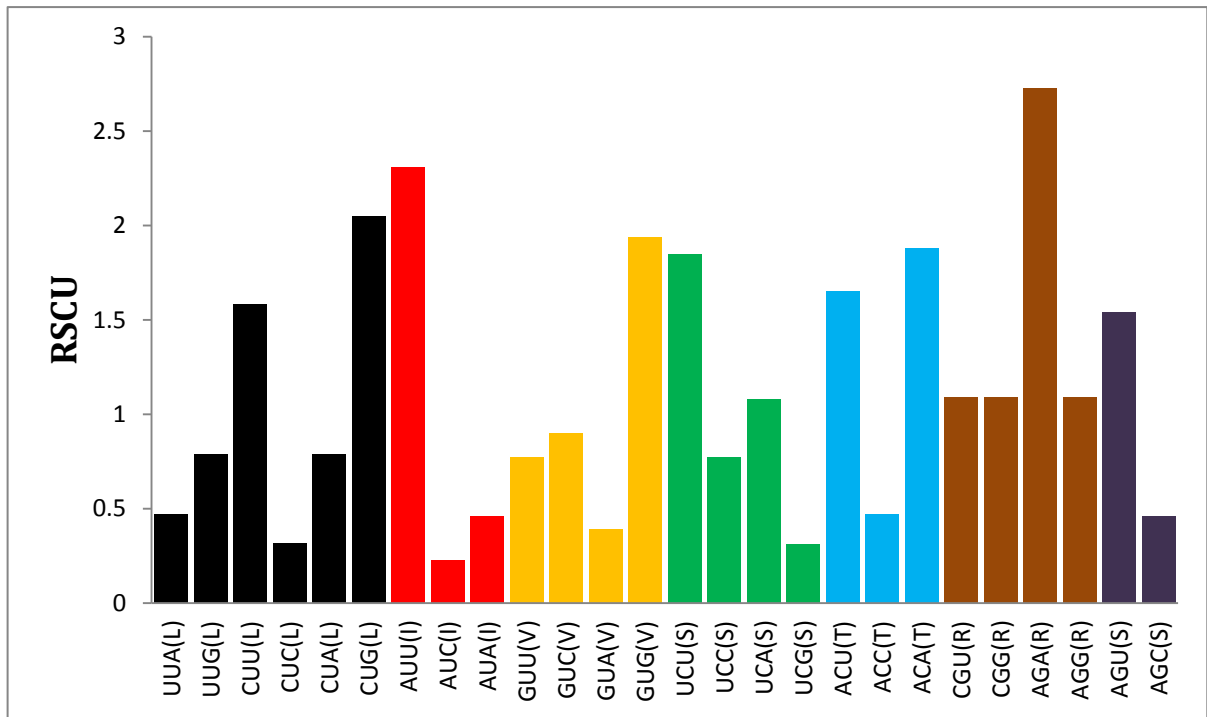

Supplementary Figure S7

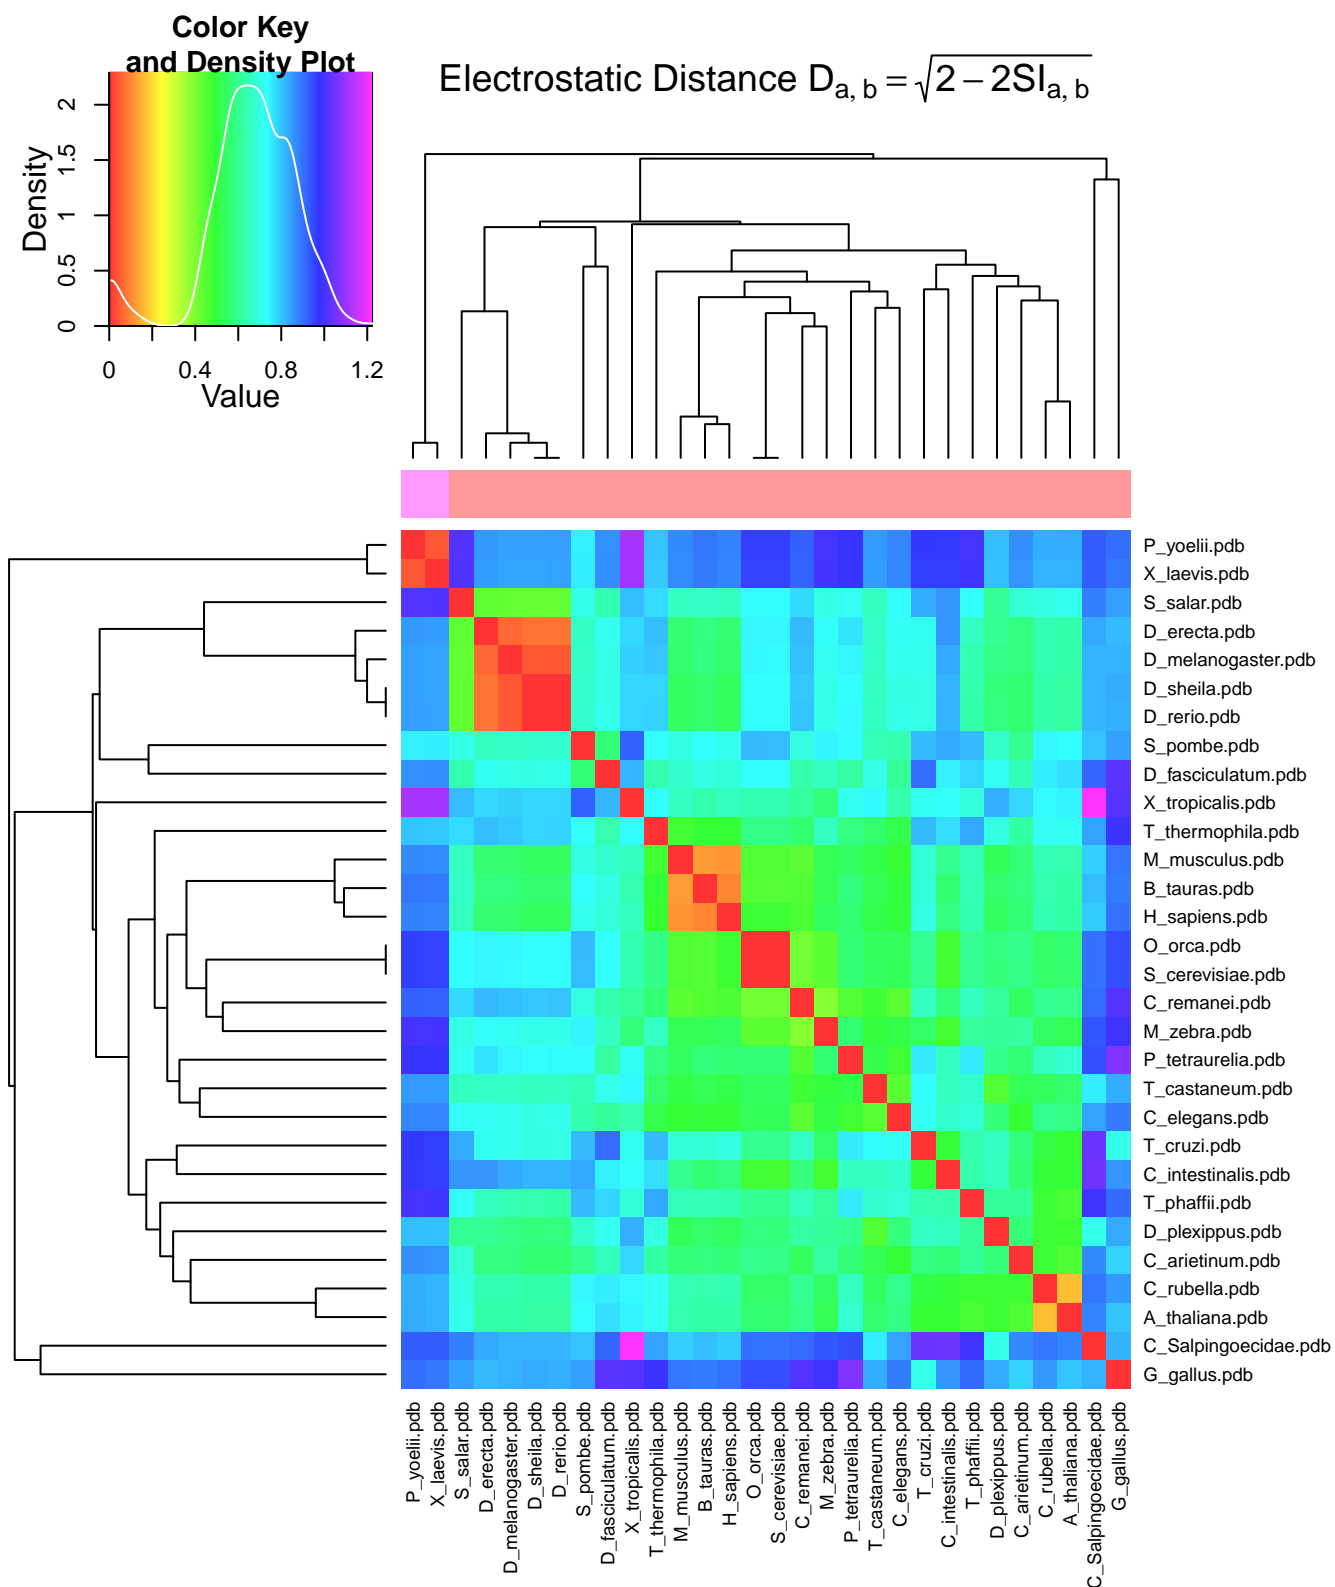

Supplement: 1471-2148-14-139-S7.pdf [file 1471-2148-14-139-S7.pdf]
