# Supplementary material for: Molecular evolution of NASP and conserved histone H3/H4 transport pathway
Source: PubMed Central journal article supplement (PMC4082323; doi:10.1186/1471-2148-14-139), 2014-06-20
Supplement: 1471-2148-14-139-S8.pdf [file 1471-2148-14-139-S8.pdf]

**Figure S8A:** Phylogenetic relationship among different fish specific NASP paralogs. Tree topology corresponds to the ML method under the JTT+G model as predicted by MEGA. Branch lengths do not reflect genetic distance. Alternatively, the same topology was also recovered by the neighbour joining method using p-distances. Confidence values for ML and NJ trees are based on 1000 bootstrap replicates and are indicated ( $\geq 50\%$ ) in light-face and boldface (underlined), respectively. The tree is rooted with *Halocynthia roretzi* and *Ciona intestinalis*.

**Figure S8, B-C:** %GC3 content and ENC values are shown in chart diagrams for the fish-specific NASP1 and NASP2 neighbouring genes, respectively. Black line separates GC3 and ENC whereas blue and red colors represent different neighbouring genes as indicated in the chart legends.

**Figure S8, D-G:** Predicted fish specific NASP1/2 TPRs 1-4 sequence alignments are shown in figures B to E, respectively. Reconstructed ancestral sequence using the ML method is shown in black background whereas different amino acid substitutions in each TPR motif for two paralogous proteins are shown in blue.

**Figure S8, H-K:** Predicted NASP1/2 TPRs 1-4 sequence alignments are shown in figures H to K, respectively, for various lineages.

Supplementary Figure S8A

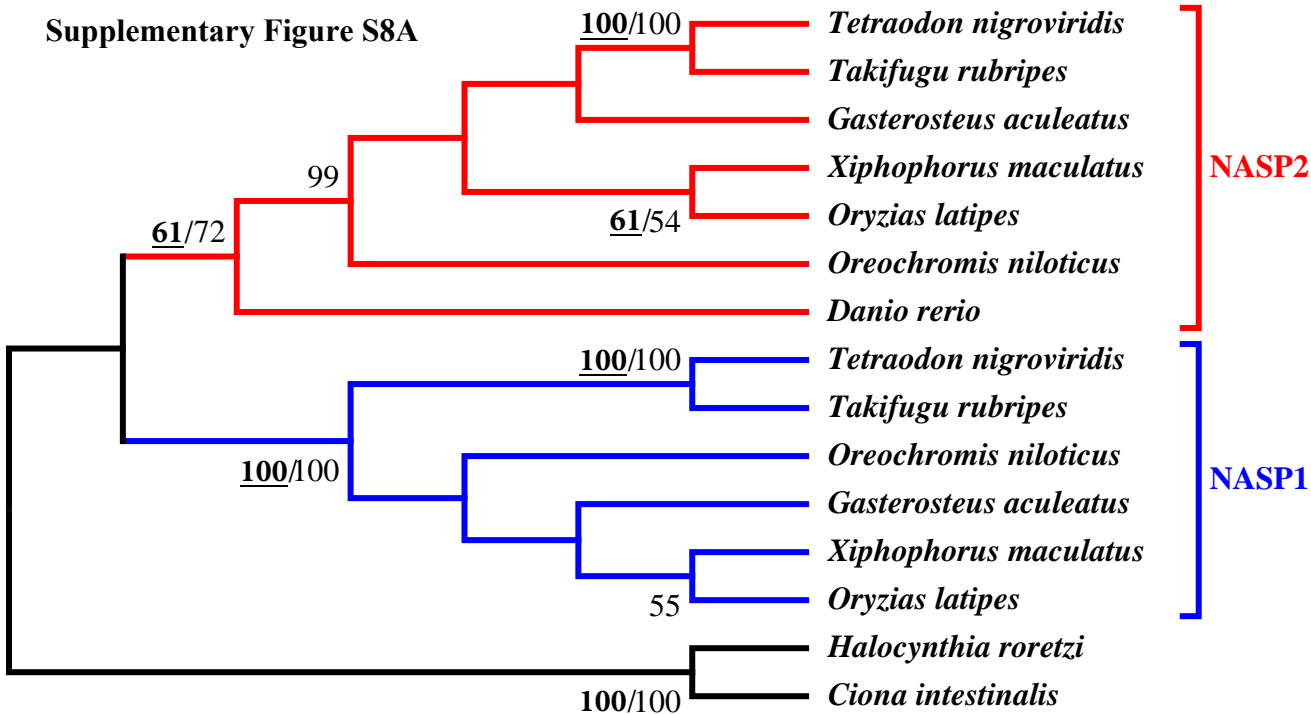

**B**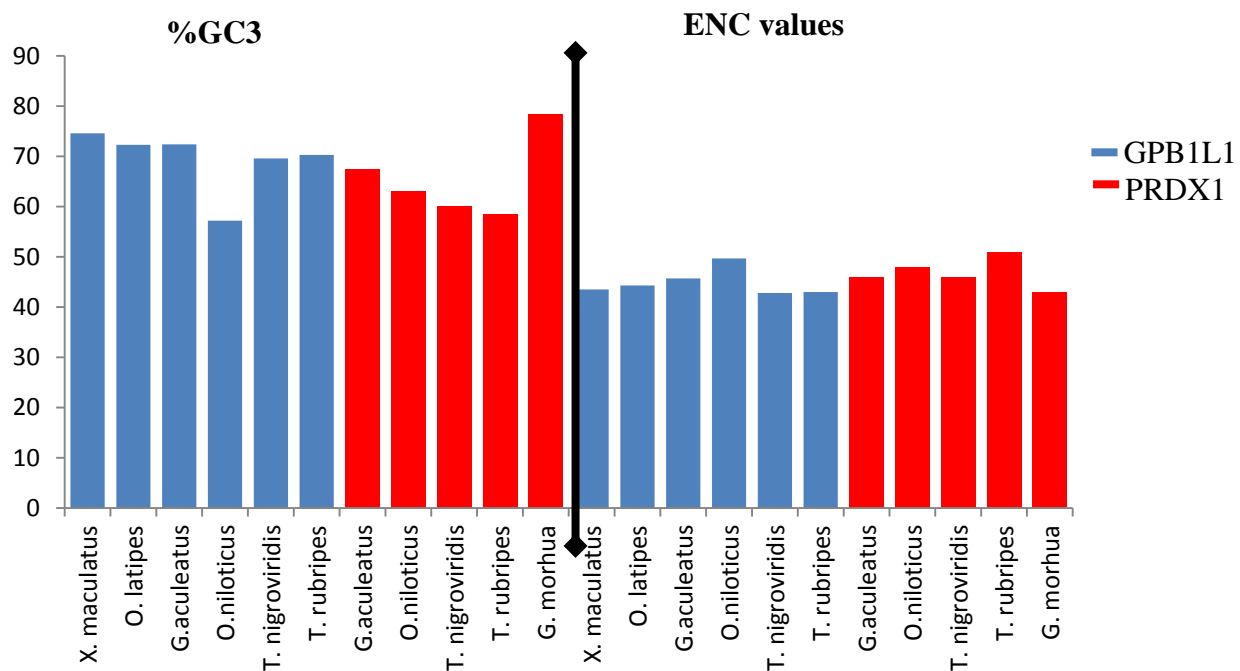**C**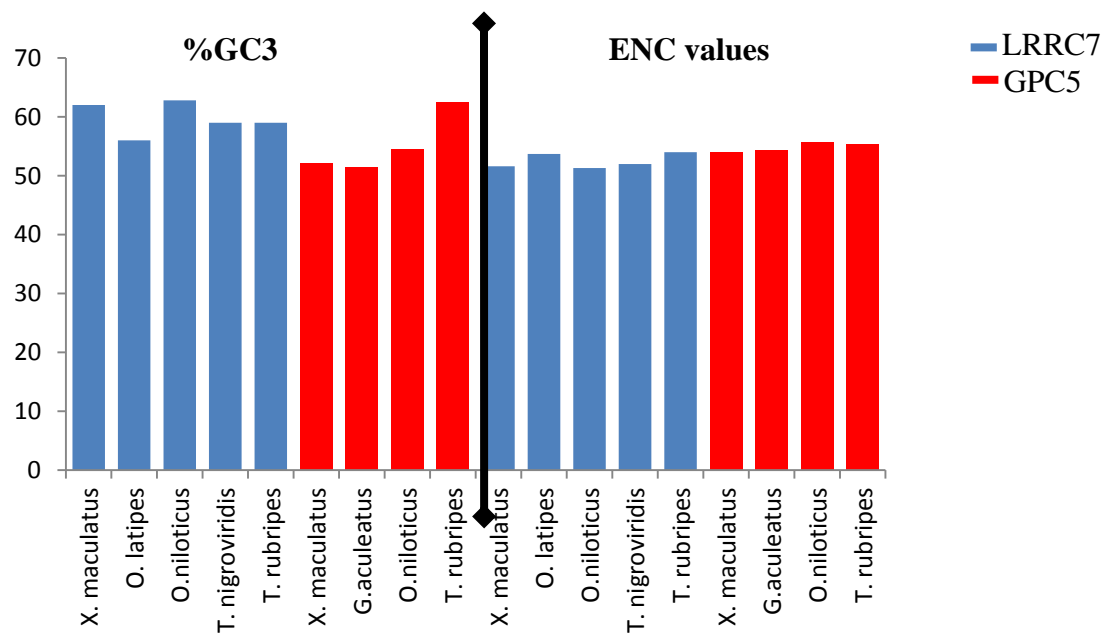

## D

|                            |   |   |   |   |      |   |   |   |   |   |   |   |   |   |    |   |   |   |   |   |   |   |   |   |   |    |   |   |   |   |   |   |   |   |
|----------------------------|---|---|---|---|------|---|---|---|---|---|---|---|---|---|----|---|---|---|---|---|---|---|---|---|---|----|---|---|---|---|---|---|---|---|
| <i>X.maculatus/1-34</i>    | A | K | K | L | I    | G | T | G | K | R | H | L | V | M | G  | D | V | V | S | A | V | N | V | F | Q | E  | A | C | S | M | L | A | A | K |
| <i>O.latipes/1-34</i>      | A | K | K | L | I    | G | T | G | K | R | H | L | V | M | G  | D | V | V | S | A | V | N | V | F | Q | D  | A | C | S | I | L | A | S | K |
| <i>G.aculeatus/1-34</i>    | A | N | K | L | I    | G | T | G | N | R | H | L | V | M | G  | D | V | V | S | A | V | R | V | F | Q | D  | A | C | S | M | L | A | A | R |
| <i>O.niloticus/1-34</i>    | A | K | K | L | I    | G | T | G | K | R | H | L | V | M | G  | D | V | V | S | A | V | S | V | F | Q | E  | A | C | G | M | L | A | E | K |
| <i>T.nigroviridis/1-34</i> | A | K | K | L | V    | G | A | G | N | K | Y | L | V | L | G  | D | V | V | S | A | V | G | V | F | Q | D  | A | C | S | M | L | A | A | K |
| <i>T.rubripes/1-34</i>     | A | K | K | L | V    | G | A | G | N | K | Y | L | V | L | G  | D | V | V | S | A | V | A | V | F | Q | D  | A | C | S | M | L | A | A | K |
| <i>D.rerio/1-34</i>        | A | K | K | L | I    | G | T | G | S | R | H | L | V | M | G  | D | V | V | S | A | V | S | V | F | Q | E  | A | C | A | M | L | A | E | K |
| Ancestral/1-34             | A | K | K | L | ? G? | G | K | K | H | L | V | M | G | D | V? | S | A | V | N | A | F | Q | E | A | C | S? | L | A | E | K |   |   |   |   |
| <i>X.maculatus/1-34</i>    | A | N | K | L | V    | G | T | G | K | K | F | L | V | T | G  | K | V | V | E | A | V | S | A | L | Q | E  | A | C | G | M | L | A | K | K |
| <i>O.latipes/1-34</i>      | A | N | K | L | I    | G | A | G | K | K | F | L | V | M | G  | K | V | V | E | A | V | S | A | L | Q | E  | A | C | G | M | L | A | K | Q |
| <i>G.aculeatus/1-34</i>    | A | N | K | L | I    | G | S | G | K | K | H | L | V | M | G  | K | V | V | E | A | V | S | A | L | Q | E  | A | C | G | M | L | A | Q | K |
| <i>O.niloticus/1-34</i>    | A | N | K | L | I    | G | T | G | K | K | H | L | V | M | G  | K | V | V | E | A | V | S | T | L | Q | E  | A | C | G | M | L | A | K | K |
| <i>T.nigroviridis/1-34</i> | A | N | K | L | V    | G | A | G | K | K | H | L | V | M | G  | K | V | V | E | A | V | N | S | L | Q | E  | A | C | G | I | L | A | K | T |
| <i>T.rubripes/1-34</i>     | A | N | K | L | I    | G | A | G | K | K | H | L | V | M | G  | K | V | V | E | A | V | N | S | L | Q | E  | A | C | G | M | L | A | K | T |

## E

|                            |   |   |   |   |   |   |   |   |   |   |   |   |   |   |   |   |     |   |   |   |   |   |   |   |   |     |   |    |    |   |    |   |   |   |   |
|----------------------------|---|---|---|---|---|---|---|---|---|---|---|---|---|---|---|---|-----|---|---|---|---|---|---|---|---|-----|---|----|----|---|----|---|---|---|---|
| <i>X.maculatus/1-34</i>    | G | E | A | F | F | L | C | G | K | S | L | L | E | L | A | R | --- | L | Q | L | A | W | E | M | L | E   | V | A  | K  | V | I  | F | K | R | K |
| <i>O.latipes/1-34</i>      | G | E | A | V | F | L | Y | G | K | S | L | L | E | L | A | R | --- | L | Q | L | A | W | E | M | L | E   | V | A  | K  | L | I  | Y | K | R | K |
| <i>G.aculeatus/1-34</i>    | A | E | A | F | F | L | C | G | K | S | L | L | E | L | A | R | --- | L | Q | L | A | W | E | M | L | E   | V | A  | K  | V | I  | Y | K | R | K |
| <i>O.niloticus/1-34</i>    | G | E | A | F | F | F | C | G | K | S | L | L | E | L | A | R | --- | L | Q | L | A | W | E | M | L | E   | V | A  | K  | V | I  | Y | K | R | K |
| <i>T.nigroviridis/1-34</i> | G | E | A | L | F | L | C | G | K | S | L | L | E | L | A | R | --- | L | Q | L | A | W | E | M | L | E   | V | A  | K  | V | I  | Y | K | R | K |
| <i>T.rubripes/1-34</i>     | G | E | A | L | F | L | C | G | K | S | L | L | E | L | A | R | --- | L | Q | L | A | W | E | M | L | E   | V | A  | K  | V | I  | Y | K | R | K |
| <i>D.rerio/1-34</i>        | G | E | V | F | F | F | C | G | K | A | L | L | E | L | A | R | --- | L | R | L | A | W | E | M | L | E   | V | A  | K  | V | I  | Y | K | R | K |
| Ancestral/1-34             | G | E | A | F | F | F | Y | G | K | S | L | L | E | L | A | R | --- | L | Q | L | A | W | E | M | L | ? L | A | K? | I? | L | R? |   |   |   |   |
| <i>X.maculatus/1-34</i>    | G | E | A | F | Y | W | C | G | K | A | L | L | D | L | A | R | --- | L | Q | L | A | W | E | M | L | E   | V | A  | K  | V | I  | Y | R | R | K |
| <i>O.latipes/1-34</i>      | G | E | A | F | L | W | C | G | K | A | L | L | D | L | A | R | --- | L | Q | L | A | W | E | M | L | E   | V | A  | K  | S | I  | Y | K | R | K |
| <i>G.aculeatus/1-34</i>    | G | E | A | F | F | W | C | G | K | A | L | L | D | L | A | R | --- | L | Q | L | A | W | E | M | L | E   | V | A  | K  | V | I  | Y | K | R | K |
| <i>O.niloticus/1-34</i>    | G | E | A | F | F | W | C | G | K | A | L | L | D | L | A | R | --- | L | Q | L | A | W | E | M | L | E   | V | A  | K  | V | I  | Y | K | R | K |
| <i>T.nigroviridis/1-34</i> | G | E | A | F | F | W | C | G | K | A | L | L | D | L | A | R | --- | L | Q | L | A | W | E | M | L | E   | V | A  | K  | V | I  | Y | K | R | K |
| <i>T.rubripes/1-34</i>     | G | E | A | F | F | W | C | G | K | A | L | L | D | L | A | R | --- | L | Q | L | A | W | E | M | L | E   | V | A  | K  | V | I  | Y | K | R | K |

**F**

*X.maculatus/1-34* AQA YLKLGEVS AETGNYP QALEDFQECLI I QL KL  
*O.latipes/1-34* AQA H LKLGEVGAETGNYP QALEDFQECLAI QL QH  
*G.aculeatus/1-34* AQA YLKLGEVS AESGNYS QALEDFQECLAL QL KH  
*O.niloticus/1-34* AQA YLKLGEVS AESGNYP QALDDFQECLAL QL KH  
*T.nigroviridis/1-34* AQI YLKLGEVS AESGNYP QALEDFQECLCL QL KY  
*T.rubripes/1-34* AQI YLKLGEVS AESGNYP QALEDFQECLCL QL KH  
*D.rerio/1-34* AQI H LKLAEVGVESGNYS QALEDSNECLTL QL KH  
**Ancestral/1-34** AQA H LKLGEVS VESGNYP QA? EDFQ? CL? I QK? H  
*X.maculatus/1-34* AQT H LKLGEVS AESGNYP QALEDFQECLKVQL KH  
*O.latipes/1-34* AQA H LKLGEVS AESGNYP QALEDFQECLKL QVKH  
*G.aculeatus/1-34* AQA H S LKLGEVS S E SGNYP QALEDFQECLKL QVKH  
*O.niloticus/1-34* AQA H LKLGEVS AESGNYP QALEDFQECLKL QVKH  
*T.nigroviridis/1-33* AQA H LKLGEVS VESGNYP QALDDFQECLKL QAK-  
*T.rubripes/1-34* AQA H LKLGEVS VESGNYP QALDDFE ECLKL QL KH

**NASP-2****G**

*X.maculatus/1-34* AETHY HVATT L V F M D Q Y D Q A I K H Y N S S V K V I E T R  
*O.latipes/1-34* AETHY HVATT L C Y M D E Y R Q A I Q H Y N S S I E V I E N R  
*G.aculeatus/1-34* AETHY HVATT L C Y M D Q Y S Q A I Q H Y N S S I K V I E T R  
*O.niloticus/1-34* AETHY HVATT L C Y M D Q Y S Q A I Q H Y N S S I K V I E T R  
*T.nigroviridis/1-34* AETHY HVATT L C Y M D K Y S Q A I Q H Y N S S I E V I E K R  
*T.rubripes/1-34* AETHY HVATT L C Y M D K Y S Q A I Q H Y N S S I E V I E K R  
*D.rerio/1-34* TETHY Q L G T T Y S Y T T Q Y N Q A I E H F S N S I K V I E S R  
**Ancestral/1-34** AETHY Q L G L A Y S Y N ? Q Y D ? A I ? H F N ? S I ? V I E ? R  
*X.maculatus/1-34* AETHY Q L G V T H S L N L Q Y V P A I Q A L N N S I S V I K N R  
*O.latipes/1-34* AETHY Q L G L T Y S L N L Q Y S P A I E A L N N S I S V I K S R  
*G.aculeatus/1-34* AETHY Q L G L T Y S L D V Q Y G R A I E E L K S S I S V I K S R  
*O.niloticus/1-34* AETHY Q L G V T Y S L N T Q Y S E A I E S L K S S I S I I K N R  
*T.nigroviridis/1-34* AETHY Q L G L T H G L N L Q H G A A V A E L S R S I S V I K S R  
*T.rubripes/1-34* AETHY Q L G L T Y G L N L Q Y N Q A I A E L N R S I S V I K S R

**NASP-2**
